# Supplementary material for: New Insights into the Regulatory Role of Ferroptosis in Ankylosing Spondylitis via Consensus Clustering of Ferroptosis-Related Genes and Weighted Gene Co-Expression Network Analysis
Source: MDPI journal article supplement (doi:10.3390/genes13081373), 2022-07-31
Supplement: s1 [file s1]

# New insights into the regulatory role of ferroptosis in ankylosing spondylitis via consensus clustering of ferroptosis-related genes and weighted gene co-expression network analysis

Tianhua Rong<sup>123</sup>, Ningyi Jia<sup>4</sup>, Bingxuan Wu<sup>123</sup>, Dacheng Sang<sup>1</sup> and Baoge Liu<sup>123\*</sup>

<sup>1</sup> Department of Orthopaedic Surgery, Spine Center, Beijing Tiantan Hospital, Capital Medical University, Beijing, China

<sup>2</sup> National Clinical Research Center for Orthopedics, Sports Medicine & Rehabilitation, Beijing, China

<sup>3</sup> Basic and Translational Medicine Center, China National Clinical Research Center for Neurological Diseases, Beijing, China

<sup>4</sup> Department of Obstetrics and Gynecology, Beijing Tiantan Hospital, Capital Medical University, Beijing, China

\* Correspondence: baogeliu@hotmail.com

## Supplementary Materials:

**Supplementary Figure S1.** Heatmap of 276 ferroptosis-related genes plotted by age groups. Red indicates high expression, and blue indicates low expression.

**Supplementary Figure S2.** Box plot shows the distribution of patient age in the two clusters determined by ferroptosis-related genes.

**Supplementary Figure S3.** External validation of consensus clustering. (A) Consensus score matrix for the 22 AS samples obtained from dataset GSE141646 when  $k = 2$ . (B) Empirical consensus cumulative distribution function plots for  $k = 2$  to 6, indicating that  $k = 2$  or 3 is acceptable. Provided the sample size and interpretability, the optimal  $k$  value was also 2.

**Supplementary Table S1.** The detailed information about the compilation of ferroptosis-related genes from the FerrDb database and PubMed articles.

**Supplementary Table S2.** Results of leukocyte deconvolution for all the AS samples using the CIBERSORT computational approach.

**Supplementary Table S3.** The detailed information about the 86 ferroptosis-related genes that expressed differently between the two clusters.

**Supplementary Table S4.** The gene significance and module membership of all genes in the turquoise module in WGCNA, and the selection of candidate hub genes.

**Supplementary Table S5.** The information about the nodes, edges, and connectivity in the multifactor regulatory network.
