# Supplementary material for: New Insights into the Regulatory Role of Ferroptosis in Ankylosing Spondylitis via Consensus Clustering of Ferroptosis-Related Genes and Weighted Gene Co-Expression Network Analysis
Source: Genes (Basel). 2022 Jul 31;13(8):1373. doi: 10.3390/genes13081373 (PMC9407156; doi:10.3390/genes13081373)
Supplement: Supplementary file 1 [file genes-13-01373-s001.zip]

Archive with 9 entries (9 files):
- Supplementary Figure S1.jpg
- Supplementary Figure S2.jpg
- Supplementary Figure S3.jpg
- Supplementary material legends.pdf
- Supplementary Table S1.xlsx
- Supplementary Table S2.xlsx
- Supplementary Table S3.xlsx
- Supplementary Table S4.xlsx
- Supplementary Table S5.xlsx
