# Supplementary material for: New Insights into the Regulatory Role of Ferroptosis in Ankylosing Spondylitis via Consensus Clustering of Ferroptosis-Related Genes and Weighted Gene Co-Expression Network Analysis
Source: Genes (Basel). 2022 Jul 31;13(8):1373. doi: 10.3390/genes13081373 (PMC9407156; doi:10.3390/genes13081373)
Supplement: Supplementary file 1 [file genes-13-01373-s001.zip › Supplementary Table S2.xlsx]

## Sheet: Immu_sample_score_p
Tag	B cells naive	B cells memory	Plasma cells	T cells CD8	T cells CD4 naive	T cells CD4 memory resting	T cells CD4 memory activated	T cells follicular helper	T cells regulatory (Tregs)	T cells gamma delta	NK cells resting	NK cells activated	Monocytes	Macrophages M0	Macrophages M1	Macrophages M2	Dendritic cells resting	Dendritic cells activated	Mast cells resting	Mast cells activated	Eosinophils	Neutrophils	P-value	Pearson Correlation	RMSE
GSM1902139	0	0.0127057	0	0.452368	0.000202287	0.0324053	0.0490045	0	0	0	0.168409	0	0.121281	0	0	0.00137294	0	0	0.0318881	0	0	0.130363	0	0.681977	0.734795
GSM1902158	0	0.0164049	0.0166857	0.119053	0.114151	0.0794231	0.0124086	0	0.0173565	0	0.0841385	0	0.181015	0.0431426	0	0	0	0.000570558	0.018157	0	0	0.297495	0	0.716432	0.709608
GSM1902165	0	0.0130152	0	0.250483	0.11493	0	0.0351466	0	0	0	0.186804	0	0.138509	0	0	0.0034013	0	0.00157204	0.024384	0	0	0.231755	0	0.55468	0.832556
GSM1902181	0	0.0132392	0	0.125143	0.164834	0.086579	0.0162553	0	0	0.00259458	0.0438414	0	0.227393	0.0011607	0	0	0	0.00384757	0.0231851	0	0	0.291927	0	0.677604	0.738886
GSM1902180	0.00262812	0.00721074	0	0.0828158	0.118103	0.052271	0.0145246	0	0.0100305	0	0.0999486	0	0.244266	0.0103838	0	0.00842128	0	0.00190654	0.0216418	0	0	0.325848	0	0.736406	0.685013
GSM1902179	0	0.0084817	0	0.180369	0.0968383	0	0.0480771	0	0.00405008	0	0.245179	0	0.158398	0.0172112	0	0	0	0	0.0155257	0	0	0.225869	0	0.690861	0.72892
GSM1902178	0	0.00564447	0	0.110182	0.119331	0.0813543	0.0144292	0	0.0203276	0	0.0801425	0	0.246016	0.0269589	0	0.00612527	0	0.000950581	0.0219678	0	0	0.266571	0	0.716548	0.709516
GSM1902177	0	0.0587776	0	0.150485	0.082136	0	0.0176843	0	0.0295184	0	0	0.0201582	0.185046	0.00912631	0	0	0	0.0114069	0.0317645	0	0	0.403897	0	0.564472	0.831835
GSM1902176	0.00633728	0.00570248	0	0.119274	0.107836	0.142752	0.0119927	0	0.0115873	0	0.168259	0	0.205024	0.00186977	0	0	0	0	0.0211606	0	0	0.198205	0	0.67837	0.743638
GSM1902175	0	0.00746075	0	0.220172	0.175916	0.0674508	0.00619043	0	0.0234353	0	0.0631712	0.001743	0.156581	0	0	0	0	0	0.00716129	0	0	0.270719	0	0.723655	0.701491
GSM1902174	0	0.00112005	0	0.366168	0.0859769	0	0.0628389	0	0.0119867	0	0.178673	0	0.104278	0.000902526	0	0	0	0	0.0176681	0	0	0.170388	0	0.613886	0.789156
GSM1902173	0.00873366	0.0265466	0	0.283024	0.0808257	0.0596754	0.0366233	0	0.0173348	0	0.0883984	0	0.1765	0	0	0.0158822	0	0.00150806	0.0429751	0	0	0.161973	0	0.639078	0.776246
GSM1902172	0	0.00389836	0.00629598	0.231181	0.0862221	0.0328298	0.0208354	0	0.0185882	0	0.0729629	0	0.2157	0.0527542	0	0	0	0	0.0163616	0	0	0.24237	0	0.692693	0.731252
GSM1902171	0	0.0137045	0	0.02788	0.135303	0.0152938	0.0291849	0	0	0.0225568	0.124633	0	0.123792	0.0273359	0	0.00952743	0	0.0086862	0.0350306	0	0	0.427072	0	0.614512	0.791911
GSM1902170	0.00938963	0	0	0.210445	0.104297	0.0804335	0.00759115	0	0.0119593	0	0.0612508	0	0.183441	0.0222869	0	0	0	0	0.0196218	0	0	0.289284	0	0.688564	0.730701
GSM1902169	0	0.00846847	0	0.131123	0.144372	0.0496639	0.0221145	0	0.00990931	0	0.114924	0	0.217769	0.0326283	0	0	0	0	0.00486728	0	0	0.264159	0	0.714225	0.711206
GSM1902168	0	0.0165517	0	0.14482	0.163028	0.0606018	0.0136701	0	0.0166545	0	0.0723689	0	0.150607	0	0	0.00567665	0	0.00254272	0.0210963	0	0	0.332382	0	0.609168	0.792859
GSM1902167	0	0.0216775	0	0.199721	0.159249	0.0962489	0.024571	0	0	0	0.05743	0	0.213041	0.00495693	0	0	0	0.00271988	0.0280762	0	0	0.192309	0	0.553832	0.831887
GSM1902163	0.00149458	0.00739493	0	0.211239	0.0479981	0	0.0338436	0	0.0086349	0	0.157755	0	0.191475	0.0251988	0	0	0	0	0.0125787	0	0	0.302388	0	0.733692	0.689269
GSM1902166	0	0.0133816	0	0.154518	0.187455	0.0609128	0.0247164	0	0.00113676	0	0.129432	0	0.161678	0.0107983	0	0.00058837	0	0.000316831	0.014932	0	0	0.240134	0	0.695754	0.72866
GSM1902164	0	0.0112729	0	0.0506317	0.0425687	0.0351665	0.0211418	0	0.00039587	0.00520585	0.133374	0	0.299395	0	0	0	0	0.0041497	0.0428546	0	0	0.353843	0	0.679074	0.734259
GSM1902162	0	0.0187338	0	0.0818778	0.0641907	0.0837046	0.0100337	0	0.00654025	0	0.0646356	0	0.210762	0	0	0	0	0.00416571	0.0386045	0	0	0.416751	0	0.742069	0.672891
GSM1902161	0.00183002	0.00324303	0	0.168965	0.0754502	0.0850234	0.0157822	0	0.00151115	0.0109765	0.095054	0	0.234994	0	0	0	0	0.0010714	0.00851309	0	0	0.297585	0	0.74006	0.683384
GSM1902160	0	0.0214979	0	0.0208171	0.0777944	0.0538456	0.0254084	0	0	0	0.0678463	0	0.120329	0.0365028	0	0	0	0.00112382	0.0408976	0	0	0.533937	0	0.756771	0.655572
GSM1902157	0	0.00209333	0	0.336916	0.0470091	0	0.0436089	0	0	0	0.140167	0	0.185466	0.00794104	0	0	0	0	0.00596859	0	0	0.23083	0	0.684256	0.734007
GSM1902155	0	0.0137492	0.0241696	0.411566	0.0404686	0	0.0671717	0	0.00212363	0	0.204634	0	0.0904873	0.00234054	0	0	0	0.000348003	0.00954044	0	0	0.133401	0	0.714799	0.706558
GSM1902159	0.00400256	0	0	0.131995	0.0758596	0.0899296	0.0284653	0	0.00268078	0.0414806	0.0709851	0	0.254157	0.0482152	0	0	0	0.00273942	0.0125586	0	0	0.236931	0	0.738357	0.693568
GSM1902154	0	0.0185288	0	0.17799	0.11248	0.0677561	0.0291704	0	0.0226284	0	0.118166	0	0.180812	0	0	0	0	0.00269567	0.0108847	0	0	0.258888	0	0.565063	0.824761
GSM1902156	0	0.00105917	0	0.101566	0.0439464	0.0828238	0.0258407	0	0.00141658	0.0699028	0.0656272	0	0.243038	0.00021034	0	0	0	0.000601979	0.00696817	0	0	0.356999	0	0.799698	0.615399
GSM1902153	0	0.0118789	0	0.201833	0.131092	0.0352565	0.0206441	0	0.00461378	0	0.141303	0	0.180802	0.0268266	0	0	0	0	0.00212786	0	0	0.243623	0	0.690325	0.731117
GSM1902151	0.00162904	0.000138306	0	0.261168	0.0797173	0.0450443	0.0288686	0	0.00482315	0	0.100907	0	0.182955	0	0	0	0	0.00120437	0.0175785	0	0	0.275967	0	0.602513	0.797945
GSM1902152	0	0.0184143	0	0.187258	0.231944	0.0216609	0.00902065	0	0.00913077	0	0.064701	0	0.216216	0.00839605	0	0	0	0.00362465	0.00749963	0	0	0.222135	0	0.70411	0.721991
GSM1902149	0	0.00152304	0	0.177947	0.0455765	0	0.0409718	0	0	0	0.191049	0	0.323634	0.0162391	0	0	0	0.00282726	0.0132208	0	0	0.187011	0	0.686571	0.733022
GSM1902150	0	0.0109311	0	0.104191	0.0993788	0.0656838	0.00415393	0	0.0179259	0	0.0944465	0	0.159137	0.0119212	0	0.000300104	0	0	0.0236346	0	0	0.408297	0	0.716914	0.69916
GSM1902148	0.00272133	0	0	0.196958	0.128327	0	0.0339109	0	0.00502124	0	0.186212	0	0.254773	0.0256313	0	0	0	0	0.0117064	0	0	0.154739	0	0.668716	0.750735
GSM1902146	0	0.00365032	0	0.113716	0.115724	0.0577138	0.014506	0	0.00530122	0	0.229586	0	0.207216	0.0327611	0	0	0	0	0.0253279	0	0	0.194497	0	0.701205	0.724478
GSM1902147	0	0.00684863	0	0.011061	0.0711772	0.0280628	0.0136827	0	0	0.0139063	0.145866	0	0.219308	0.0446835	0	0	0	0.000741919	0.0153648	0	0	0.429297	0	0.704656	0.710679
GSM1902145	0	0.00689877	0	0.145273	0.135328	0.0176474	0.0300944	0	0.00922337	0	0.116352	0	0.251038	0.00935664	0	0	0	0.000515197	0.0102261	0	0	0.268047	0	0.70075	0.720579
GSM1902144	0.000146581	0	0	0.200767	0.102112	0.0493328	0.022659	0	0.00227955	0	0.0963831	0	0.217182	0.0321865	0	0	0	0	0.0226979	0	0	0.254253	0	0.706689	0.718298
GSM1902143	0	0.00582826	0	0.19172	0.0321792	0.044708	0.0385263	0	0	0	0.185509	0	0.161203	0.0510067	0	0	0	0	0.0219744	0	0	0.267345	0	0.692889	0.72773
GSM1902142	0	0.00533424	0	0.194787	0.123189	0.0189296	0.0141792	0	0.0199516	0	0.148038	0	0.2129	0.000455898	0	0	0	0.000487056	0.00703403	0	0	0.254714	0	0.691344	0.728467
GSM1902141	0	0.0137558	0	0.165828	0.0769722	0.047393	0.00616238	0	0.015537	0	0.0693273	0	0.204153	0.0465393	0	0	0	0	0.024293	0	0	0.330039	0	0.71939	0.70137
GSM1902138	0	0.00849928	0	0.0924356	0.0968371	0.0829145	0.0142611	0	0	0	0.114063	0	0.180424	0.0437132	0	0	0	0.000802743	0.0264332	0	0	0.339616	0	0.718293	0.702308
GSM1902137	0	0.0183125	0	0.167992	0.0860866	0.0163943	0.0448067	0	0.0112563	0	0.0984357	0	0.228204	0.0228086	0	0	0	0.0016728	0.0194593	0	0	0.284572	0	0.680873	0.737376
GSM1902140	0	0.00509528	0	0.137749	0.178444	0.0535954	0.00769326	0	0.00814473	0	0.0594858	0.00173079	0.132486	0.0401125	0	0	0	0	0.0237401	0	0	0.351723	0	0.746796	0.676045
GSM1902136	0	0.00431494	0	0.253941	0.110803	0.052838	0.0170266	0	0.0153716	0	0.0922872	0	0.218938	0	0	0.0014479	0	0	0.016444	0	0	0.216588	0	0.734688	0.696685
GSM1902135	0	0.00400015	0	0.150319	0.116617	0.0732993	0.0363552	0	0.00174547	0	0.187606	0	0.241777	0.00138199	0	0	0	0.000343831	0.0263691	0	0	0.160186	0	0.629172	0.780193
GSM1902134	0.00410368	0.000387249	0	0.225395	0.0347883	0	0.0365864	0	0.0112405	0	0.0893525	0	0.243548	0.020401	0	0	0	0.00152751	0.0257607	0	0	0.306909	0	0.722002	0.699371
GSM1902133	0.0111709	0.00619199	0	0.167764	0.131108	0.0102502	0.0174943	0	0	0	0.16159	0	0.173248	0	0	0.0156182	0	0.00274858	0.0474328	0	0	0.255383	0	0.646308	0.766266
GSM1902132	0.00237863	0	0	0.176203	0.0540892	0.0583537	0.00502689	0	0.0122768	0	0.0863875	0	0.273382	0	0	0.00170294	0	0.00062325	0.0356099	0	0	0.293967	0	0.718657	0.702384
GSM1902131	0	0.000287534	0	0.27144	0.103753	0.0554819	0.00433462	0	0.0271568	0	0.0699121	0	0.155977	0	0	0	0	0	0.0145084	0	0	0.29715	0	0.656705	0.755428
GSM1902130	0	0	0	0.347755	0	0.0200177	0.043541	0	0.0022341	0	0.183937	0	0.208598	0	0	0	0	0	0.0193486	0	0	0.174569	0	0.721527	0.703264
