# Supplementary material for: New Insights into the Regulatory Role of Ferroptosis in Ankylosing Spondylitis via Consensus Clustering of Ferroptosis-Related Genes and Weighted Gene Co-Expression Network Analysis
Source: Genes (Basel). 2022 Jul 31;13(8):1373. doi: 10.3390/genes13081373 (PMC9407156; doi:10.3390/genes13081373)
Supplement: Supplementary file 1 [file genes-13-01373-s001.zip › Supplementary Table S3.xlsx]

## Sheet: DEGs-Ferroptosis marker
Symbol	Name	HGNC_ID
PTGS2	Prostaglandin-endoperoxide synthase 2	HGNC:9605
DUSP1	Dual specificity phosphatase 1	HGNC:3064
NCF2	Neutrophil cytosolic factor 2	HGNC:7661
UBC	Ubiquitin C	HGNC:12468
SRXN1	Sulfiredoxin 1	HGNC:16132
BNIP3	BCL2 interacting protein 3	HGNC:1084
SLC7A11	Solute carrier family 7 member 11	HGNC:11059
TSC22D3	TSC22 domain family member 3	HGNC:3051
TXNIP	Thioredoxin interacting protein	HGNC:16952
PSAT1	Phosphoserine aminotransferase 1	HGNC:19129
XBP1	X-box binding protein 1	HGNC:12801
SLC3A2	Solute carrier family 3 member 2	HGNC:11026
ATF4	Activating transcription factor 4	HGNC:786
CEBPG	CCAAT enhancer binding protein gamma	HGNC:1837
EIF2S1	Eukaryotic translation initiation factor 2 subunit 1	HGNC:3265
HSD17B11	Hydroxysteroid 17-beta dehydrogenase 11	HGNC:22960
HMOX1	Heme oxygenase 1	HGNC:5013
TF	Transferrin	HGNC:11740
FTL	Ferritin light chain	HGNC:3999
RPL8	Ribosomal protein L8	HGNC:10368
TFRC	Transferrin receptor	HGNC:11763
FTH1	Ferritin heavy chain 1	HGNC:3976
SLC40A1	Solute carrier family 40 member 1	HGNC:10909
GPX4	Glutathione peroxidase 4	HGNC:4556
NFE2L2	Nuclear factor, erythroid 2 like 2	HGNC:7782
MAPK14	Mitogen-activated protein kinase 14	HGNC:6876
SLC2A14	Solute carrier family 2 member 14	HGNC:18301
ALOX5	Arachidonate 5-lipoxygenase	HGNC:435
ACSF2	Acyl-CoA synthetase family member 2	HGNC:26101
SP1	Sp1 transcription factor	HGNC:11205
PRDX1	Peroxiredoxin 1	HGNC:9352

## Sheet: DEGs-Ferroptosis driver
Symbol	Name	HGNC_ID
RPL8	Ribosomal protein L8	HGNC:10368
IREB2	Iron response element binding protein 2	HGNC:6115
CS	Citrate synthase	HGNC:2422
ACSF2	Acyl-CoA synthetase family member 2	HGNC:26101
NOX4	Nicotinamide adenine dinucleotide phosphate (NADPH) oxidase (NOX) 4	HGNC:7891
TP53	Tumor protein p53	HGNC:11998
ACSL4	Acyl-CoA synthetase long chain family member 4	HGNC:3571
LPCAT3	Lysophosphatidylcholine acyltransferase 3	HGNC:30244
NRAS	NRAS proto-oncogene, GTPase	HGNC:7989
HRAS	HRas proto-oncogene, GTPase	HGNC:5173
TF	Transferrin	HGNC:11740
TFRC	Transferrin receptor	HGNC:11763
SLC38A1	Solute carrier family 38 member 1	HGNC:13447
SLC1A5	Solute carrier family 1 member 5	HGNC:10943
GLS2	Glutaminase 2	HGNC:29570
GOT1	Glutamic-oxaloacetic transaminase 1	HGNC:4432
ALOX5	Arachidonate 5-lipoxygenase	HGNC:435
KEAP1	Kelch like ECH associated protein 1	HGNC:23177
HMOX1	Heme oxygenase 1	HGNC:5013
ATG5	Autophagy related 5	HGNC:589
NCOA4	Nuclear receptor coactivator 4	HGNC:7671
ALOX12	Arachidonate 12-lipoxygenase, 12S type	HGNC:429
ALOX15	Arachidonate 15-lipoxygenase	HGNC:433
ULK1	Unc-51 like autophagy activating kinase 1	HGNC:12558
BECN1	Beclin 1	HGNC:1034
GABARAPL2	GABA type A receptor associated protein like 2	HGNC:13291
GABARAPL1	GABA type A receptor associated protein like 1	HGNC:4068
WIPI1	WD repeat domain, phosphoinositide interacting 1	HGNC:25471
WIPI2	WD repeat domain, phosphoinositide interacting 2	HGNC:32225
SNX4	Sorting nexin 4	HGNC:11175
SAT1	Spermidine/spermine N1-acetyltransferase 1	HGNC:10540
MAPK3	Mitogen-activated protein kinase 3	HGNC:6877
MAPK1	Mitogen-activated protein kinase 1	HGNC:6871
BID	BH3 interacting domain death agonist	HGNC:1050
PEBP1	Phosphatidylethanolamine binding protein 1	HGNC:8630
MAPK9	Mitogen-activated protein kinase 9	HGNC:6886
MAPK14	Mitogen-activated protein kinase 14	HGNC:6876
BAP1	BRCA1 associated protein 1	HGNC:950
ACVR1B	Activin A receptor type 1B	HGNC:172
HIF1A	Hypoxia inducible factor 1 subunit alpha	HGNC:4910
TLR4	Toll like receptor 4	HGNC:11850
ATM	ATM serine/threonine kinase	HGNC:795
TAZ	Tafazzin	HGNC:11577
MTDH	Metadherin	HGNC:29608
DNAJB6	DnaJ heat shock protein family (Hsp40) member B6	HGNC:14888
LONP1	Lon peptidase 1, mitochondrial	HGNC:9479

## Sheet: DEGs-Ferroptosis suppressor
Symbol	Name	HGNC_ID
SLC7A11	Solute carrier family 7 member 11	HGNC:11059
GPX4	Glutathione peroxidase 4	HGNC:4556
AKR1C1	Aldo-keto reductase family 1 member C1	HGNC:384
AKR1C2	Aldo-keto reductase family 1 member C2	HGNC:385
AKR1C3	Aldo-keto reductase family 1 member C3	HGNC:386
NFE2L2	Nuclear factor, erythroid 2 like 2	HGNC:7782
SQSTM1	Sequestosome 1	HGNC:11280
HMOX1	Heme oxygenase 1	HGNC:5013
FTH1	Ferritin heavy chain 1	HGNC:3976
SLC40A1	Solute carrier family 40 member 1	HGNC:10909
CISD1	CDGSH iron sulfur domain 1	HGNC:30880
HSPA5	Heat shock protein family A (Hsp70) member 5	HGNC:5238
ATF4	Activating transcription factor 4	HGNC:786
TP53	Tumor protein p53	HGNC:11998
SCD	Stearoyl-CoA desaturase	HGNC:10571
STAT3	Signal transducer and activator of transcription 3	HGNC:11364
CDKN1A	Cyclin dependent kinase inhibitor 1A	HGNC:1784
FH	Fumarate hydratase	HGNC:3700
CBS	Cystathionine beta-synthase	HGNC:1550
ISCU	Iron-sulfur cluster assembly enzyme	HGNC:29882
BRD4	Bromodomain containing 4	HGNC:13575
ARNTL	Aryl hydrocarbon receptor nuclear translocator like	HGNC:701
HIF1A	Hypoxia inducible factor 1 subunit alpha	HGNC:4910
AIFM2	Apoptosis inducing factor mitochondria associated 2	HGNC:21411
LAMP2	Lysosomal associated membrane protein 2	HGNC:6501

## Sheet: DEGs-Pooled unique FRGs
Gene Symbol
RPL8
IREB2
CS
ACSF2
NOX4
TP53
ACSL4
LPCAT3
NRAS
HRAS
TF
TFRC
SLC38A1
SLC1A5
GLS2
GOT1
ALOX5
KEAP1
HMOX1
ATG5
NCOA4
ALOX12
ALOX15
ULK1
BECN1
GABARAPL2
GABARAPL1
WIPI1
WIPI2
SNX4
SAT1
MAPK3
MAPK1
BID
PEBP1
MAPK9
MAPK14
BAP1
ACVR1B
HIF1A
TLR4
ATM
TAZ
MTDH
DNAJB6
LONP1
SLC7A11
GPX4
AKR1C1
AKR1C2
AKR1C3
NFE2L2
SQSTM1
FTH1
SLC40A1
CISD1
HSPA5
ATF4
SCD
STAT3
CDKN1A
FH
CBS
ISCU
BRD4
ARNTL
AIFM2
LAMP2
PTGS2
DUSP1
NCF2
UBC
SRXN1
BNIP3
TSC22D3
TXNIP
PSAT1
XBP1
SLC3A2
CEBPG
EIF2S1
HSD17B11
FTL
SLC2A14
SP1
PRDX1
