# Supplementary material for: New Insights into the Regulatory Role of Ferroptosis in Ankylosing Spondylitis via Consensus Clustering of Ferroptosis-Related Genes and Weighted Gene Co-Expression Network Analysis
Source: Genes (Basel). 2022 Jul 31;13(8):1373. doi: 10.3390/genes13081373 (PMC9407156; doi:10.3390/genes13081373)
Supplement: Supplementary file 1 [file genes-13-01373-s001.zip › Supplementary Table S4.xlsx]

## Sheet: turquoise_true
Gene symbol	Gene significance (GS)	Module membership (MM)
GPN2	-0.59943	0.645338
SUMO2	-0.596549	0.7148			|GS|>0.5 & |MM|>0.7
PDXP	-0.582515	0.706461
DIMT1L	-0.579417	0.79174			gene	GS	MM	turquoise
CD81	-0.575176	0.715617			AFG3L2	-0.502184	0.782483	TRUE
MRPL36	-0.571159	0.737381			C6orf153	-0.513569	0.703096	TRUE
LOC645317	-0.566241	0.652532			CD81	-0.575176	0.715617	TRUE
LOC645968	-0.5647	0.588282			CENPB	-0.54052	0.773549	TRUE
LOC645385	-0.559691	0.825582			COMMD7	-0.528038	0.745915	TRUE
TMEM126B	-0.552846	0.750618			DIMT1L	-0.579417	0.79174	TRUE
ZMYM6	-0.550887	0.799944			EIF4A1	-0.515779	0.800389	TRUE
NDUFA12	-0.5488	0.756923			GIMAP6	-0.522154	0.768669	TRUE
POLE3	-0.545885	0.855834			GTF2E2	-0.529433	0.744445	TRUE
LOC391532	-0.543187	0.756554			LOC100131609	-0.529848	0.803897	TRUE
CENPB	-0.54052	0.773549			LOC391532	-0.543187	0.756554	TRUE
PSMA6	-0.537616	0.698492			LOC402112	-0.518079	0.770201	TRUE
WDR67	-0.536159	0.691835			LOC644511	-0.506211	0.825165	TRUE
TRAPPC6A	-0.534482	0.649433			LOC645385	-0.559691	0.825582	TRUE
LOC644563	-0.531884	0.605556			LOC645387	-0.519964	0.889339	TRUE
DBI	-0.531563	0.578958			LOC728643	-0.531337	0.766129	TRUE
LOC728643	-0.531337	0.766129			LOC728658	-0.503497	0.847709	TRUE
SNRPB2	-0.530578	0.79734			LOC728732	-0.50502	0.82284	TRUE
LOC100131609	-0.529848	0.803897			MRPL17	-0.501918	0.730393	TRUE
PSMB7	-0.529675	0.664471			MRPL36	-0.571159	0.737381	TRUE
MRPS11	-0.529462	0.67494			NDUFA12	-0.5488	0.756923	TRUE
GTF2E2	-0.529433	0.744445			NDUFS4	-0.517817	0.853278	TRUE
COX5B	-0.528631	0.686376			NIP7	-0.501121	0.787592	TRUE
COMMD7	-0.528038	0.745915			OSTC	-0.507774	0.779749	TRUE
MRPL22	-0.52492	0.68958			PDXP	-0.582515	0.706461	TRUE
TUBB	-0.522403	0.690181			POLE3	-0.545885	0.855834	TRUE
GIMAP6	-0.522154	0.768669			POLR2G	-0.51411	0.759254	TRUE
LOC645387	-0.519964	0.889339			SNHG6	-0.503708	0.737496	TRUE
LOC402112	-0.518079	0.770201			SNRPB2	-0.530578	0.79734	TRUE
NDUFS4	-0.517817	0.853278			SUMO2	-0.596549	0.7148	TRUE
EIF4A1	-0.515779	0.800389			TCEAL8	-0.502834	0.880456	TRUE
TSR2	-0.514596	0.779019			TMEM126B	-0.552846	0.750618	TRUE
POLR2G	-0.51411	0.759254			TMEM88	0.511213	-0.712072	TRUE
C6orf153	-0.513569	0.703096			TSR2	-0.514596	0.779019	TRUE
LOC284821	-0.513266	0.687572			ZMYM6	-0.550887	0.799944	TRUE
TMEM160	-0.511666	0.664704
C6orf48	-0.511219	0.543017
DGCR6	-0.511096	0.675697
ETFB	-0.51037	0.617785
OSTC	-0.507774	0.779749
NDUFA11	-0.50674	0.630504
LOC644511	-0.506211	0.825165
NDUFB7	-0.505354	0.699642
LOC728732	-0.50502	0.82284
SNHG6	-0.503708	0.737496
LOC728658	-0.503497	0.847709
ALDH9A1	-0.50305	0.539111
TCEAL8	-0.502834	0.880456
AFG3L2	-0.502184	0.782483
MRPL17	-0.501918	0.730393
NIP7	-0.501121	0.787592
COX8A	-0.501038	0.661554
CCDC28B	-0.499977	0.476776
LOC653505	-0.498225	0.810025
HNRNPA0	-0.49765	0.80993
SCO1	-0.496549	0.525482
ATP5F1	-0.494763	0.831116
EXOSC2	-0.494119	0.569919
LOC441089	-0.492795	0.688427
DNAJC8	-0.49237	0.782806
LOC100132795	-0.492004	0.723779
C20orf20	-0.491013	0.66486
GSTP1	-0.490831	0.618998
ENOPH1	-0.490366	0.834584
RPL12	-0.489773	0.791508
COX7A2	-0.487093	0.72727
GIMAP1	-0.485576	0.796064
MCRS1	-0.484885	0.710664
PIGU	-0.484826	0.766624
INTS9	-0.484515	0.671388
LOC642250	-0.484465	0.862544
LOC100129553	-0.483709	0.866889
GTPBP6	-0.48355	0.740981
LSM2	-0.482717	0.765268
LOC651436	-0.482691	0.831163
FAU	-0.480561	0.764179
C22orf28	-0.4804	0.636288
FAM108A3	-0.4798	0.570596
LOC648638	-0.478619	0.591119
IMP4	-0.478456	0.751737
MRPL47	-0.477279	0.728218
TMED10P	-0.477183	0.754128
SNIP1	-0.475745	0.590115
POLR3GL	-0.47469	0.741313
RPL24	-0.474168	0.876593
LSM1	-0.473948	0.565313
LOC728873	-0.473346	0.841057
BCL7B	-0.472936	0.748247
C14orf156	-0.472676	0.810891
CCDC102A	-0.470854	0.696904
EXOSC3	-0.470821	0.685825
ATP5L	-0.470279	0.753688
PPM1G	-0.469811	0.833244
COPS8	-0.469601	0.683259
MED10	-0.469519	0.842237
RPL27A	-0.469341	0.807678
WDR61	-0.468015	0.815194
RPS21	-0.467937	0.645587
SIVA1	-0.467354	0.732454
TMEM85	-0.465688	0.710832
LOC158345	-0.465425	0.80999
LOC728973	-0.465316	0.750212
LOC390354	-0.463483	0.894971
CCT2	-0.462833	0.730813
AIMP2	-0.461809	0.776672
C19orf70	-0.461801	0.878036
LOC729742	-0.461177	0.762763
LOC100132715	-0.458683	0.820404
NXT1	-0.458602	0.838606
MRPL18	-0.458487	0.732151
BOP1	-0.458257	0.769522
LOC100130624	-0.458173	0.724493
LOC347544	-0.456313	0.764603
RAN	-0.455532	0.863732
YWHAQ	-0.4555	0.763417
GEMIN6	-0.455318	0.603561
ZC3HC1	-0.454838	0.816138
PPIE	-0.454652	0.824555
WDR74	-0.454203	0.750255
TOMM40	-0.453803	0.833964
LOC100128060	-0.453377	0.679453
LOC729102	-0.453284	0.818658
LOC645436	-0.453156	0.864208
LOC644907	-0.453056	0.795742
HACL1	-0.451718	0.798715
DDX47	-0.451372	0.896313
PMVK	-0.451186	0.63586
MRPL37	-0.450272	0.740662
SNRPB	-0.449936	0.789996
ZNF22	-0.44933	0.911072
NOL7	-0.449187	0.78811
MRPL11	-0.448954	0.823067
TOMM5	-0.448055	0.809039
LOC644037	-0.448043	0.716358
LOC643997	-0.447948	0.588414
LOC402694	-0.447359	0.878991
LOC653232	-0.447022	0.879791
ARL5A	-0.446637	0.773099
LOC388654	-0.446613	0.845953
LOC100129585	-0.446379	0.72415
PPP1CC	-0.446084	0.883675
TOMM22	-0.445885	0.844149
LOC402644	-0.445665	0.685545
TBCA	-0.444289	0.859396
KRTCAP2	-0.444282	0.730781
SNRPF	-0.443443	0.918084
ATP5C1	-0.442906	0.778282
PDHB	-0.441472	0.808665
BRD2	-0.441345	0.567252
C1orf109	-0.440975	0.653323
RCN2	-0.440799	0.62225
LOC731985	-0.440183	0.770014
LOC100133931	-0.439985	0.846577
RPL14L	-0.43989	0.828481
LOC646483	-0.439811	0.775446
GEMIN4	-0.439567	0.710892
C2orf29	-0.439078	0.720012
POLA2	-0.438141	0.544735
TMED3	-0.437694	0.691217
AGA	-0.437438	0.704433
UBE2V2	-0.436525	0.626615
PTPMT1	-0.43652	0.79759
LOC387930	-0.435391	0.841815
ERH	-0.435298	0.672309
LOC729617	-0.433994	0.853815
LOC286444	-0.433837	0.849889
PSMB1	-0.4333	0.686179
MRTO4	-0.433174	0.617348
SHFM1	-0.432997	0.864589
NIT2	-0.43278	0.696828
TTC4	-0.432184	0.893843
DCTPP1	-0.430358	0.834382
VIL2	-0.42869	0.699792
C11orf10	-0.427778	0.803331
SAMM50	-0.427223	0.757378
LOC728481	-0.427039	0.79968
BTBD2	-0.426865	0.637718
PLAC8	-0.426708	0.759624
SCAMP3	-0.426509	0.757209
HIC2	-0.426224	0.684595
FAM162A	-0.425491	0.80291
CIP29	-0.425461	0.775719
GNL2	-0.425459	0.761287
LOC648771	-0.424515	0.790555
LOC646630	-0.423102	0.684766
LOC728739	-0.423007	0.632945
COMMD6	-0.422995	0.855258
SIVA	-0.422985	0.696816
RPUSD2	-0.422469	0.809698
LOC647361	-0.42244	0.7872
CD7	-0.422385	0.746606
GNPDA2	-0.422291	0.69533
LOC645296	-0.4222	0.865655
RIOK2	-0.42196	0.774849
HMGN1	-0.421719	0.843425
LOC727803	-0.421398	0.818218
LOC285900	-0.421375	0.909126
C1orf19	-0.421261	0.866098
NDUFA8	-0.420942	0.722927
MRPL32	-0.420933	0.782081
SPCS2	-0.42048	0.584007
DIS3L	-0.419955	0.693157
UFSP2	-0.419285	0.734677
NDUFB2	-0.418499	0.848435
TMEM5	-0.418383	0.815468
QARS	-0.417903	0.833513
LOC100131866	-0.417308	0.731709
MRPS26	-0.417181	0.762543
LOC100128266	-0.41714	0.796684
VAMP8	-0.417092	0.579633
DNLZ	-0.416486	0.49558
PTCD1	-0.4159	0.639294
LOC643284	-0.415843	0.774693
TMCO1	-0.415684	0.75522
LOC341457	-0.415304	0.832041
LOC128192	-0.414791	0.751389
LOC728368	-0.414109	0.841601
LOC646200	-0.413968	0.919638
LSM4	-0.413828	0.711392
LOC283412	-0.413156	0.857984
RBMX	-0.413106	0.801759
YIF1A	-0.412435	0.643633
ZNF207	-0.411908	0.757102
LOC651697	-0.411532	0.688171
C8orf40	-0.411389	0.771402
LOC100129379	-0.410155	0.791843
METTL13	-0.409703	0.837259
NSDHL	-0.409612	0.687992
RPS27L	-0.409481	0.834037
PRPS2	-0.409428	0.745176
LOC645691	-0.408954	0.78767
PSMC3	-0.408455	0.676657
PIGP	-0.408108	0.789481
GLG1	-0.408059	0.72192
LOC646949	-0.407494	0.567369
GLO1	-0.407292	0.764773
STX8	-0.407237	0.713495
TRAPPC2L	-0.407169	0.672814
UBE2N	-0.407021	0.858682
C6orf66	-0.406844	0.820029
NDUFB5	-0.406748	0.843663
IDH3B	-0.406722	0.712474
LOC388122	-0.406523	0.68404
LOC642755	-0.405929	0.807708
LOC100133185	-0.404977	0.715101
EI24	-0.404949	0.772668
PIGC	-0.404789	0.655484
ATP6V0E2	-0.404156	0.753287
PLSCR3	-0.403955	0.779773
LOC642975	-0.4037	0.844194
TRAPPC2P1	-0.403336	0.641171
COX4I1	-0.402833	0.802532
EIF3H	-0.402796	0.776141
RP9	-0.40201	0.679653
FBL	-0.401903	0.863699
HIGD2A	-0.401869	0.840624
SUMO3	-0.401304	0.845752
LOC643287	-0.401037	0.755451
PHAX	-0.400958	0.756304
EXOSC7	-0.400582	0.771704
COX6C	-0.40044	0.913425
C9orf103	-0.399925	0.64849
LOC643531	-0.39986	0.930162
LOC644315	-0.399663	0.87979
HNRPR	-0.398782	0.773358
LOC441876	-0.398573	0.862124
C21orf33	-0.3985	0.712685
LOC387867	-0.398053	0.81762
LOC100129902	-0.397949	0.773787
ZFP90	-0.397434	0.598935
RPS4X	-0.397392	0.761786
RPL12P6	-0.396849	0.730819
MRPS22	-0.396838	0.760101
HADH	-0.396314	0.806754
HDDC2	-0.396249	0.730532
GTF2A2	-0.395742	0.771121
LOC646672	-0.395363	0.686011
MRPS7	-0.395268	0.665227
LOC652624	-0.395057	0.707895
MAGOH	-0.394753	0.631247
LOC645683	-0.394674	0.786427
CMC1	-0.39465	0.604579
LOC391126	-0.394594	0.773831
LOC440589	-0.393613	0.822925
TRIM4	-0.393091	0.611855
NUBP1	-0.392848	0.639543
DDX50	-0.392436	0.840091
EMP3	-0.392314	0.731714
LOC727865	-0.392311	0.779866
PMPCB	-0.39215	0.863149
LOC100129645	-0.392138	0.599607
PGRMC2	-0.391685	0.805521
TMEM203	-0.391264	0.883948
PSMB6	-0.390544	0.735105
MRPL51	-0.390537	0.862108
HNRPA1L-2	-0.389972	0.805323
NDUFB9	-0.389287	0.820264
AIFM1	-0.389121	0.553869
PSMC5	-0.389071	0.855402
ANKRD46	-0.388354	0.810431
RPL13A	-0.388269	0.819323
LOC648294	-0.388244	0.879867
LSM7	-0.387493	0.847127
DAD1	-0.387412	0.80666
TOMM6	-0.387315	0.854313
RPL3	-0.387292	0.834776
LOC643863	-0.387109	0.880104
LOC441775	-0.38673	0.832602
CRLS1	-0.386708	0.722471
SFRS10	-0.386634	0.805899
BEX4	-0.386339	0.675282
LOC100129657	-0.386326	0.849696
RPS3	-0.385586	0.820672
LOC440737	-0.385573	0.857591
GMDS	-0.38518	0.627003
LOC92755	-0.385144	0.60548
SH2D1A	-0.385141	0.774711
LOC729646	-0.384911	0.799059
NUP62	-0.384685	0.861388
TIGD5	-0.384542	0.550091
APRT	-0.384346	0.852236
SDCCAG10	-0.384342	0.897342
ADCK2	-0.384227	0.725619
LOC729362	-0.383879	0.706648
LOC649049	-0.383531	0.871705
LOC647037	-0.383008	0.552834
PSMG4	-0.382077	0.642373
TMEM138	-0.381962	0.65523
GNB2L1	-0.381781	0.762693
FAM44B	-0.381651	0.767972
IER3IP1	-0.381495	0.750378
RWDD1	-0.380884	0.887912
PRPS1	-0.380573	0.85657
UTP11L	-0.380241	0.651792
LOC124512	-0.379859	0.839644
SKAP1	-0.379804	0.861313
LOC646849	-0.379742	0.733747
LOC728576	-0.379457	0.891763
TRIM68	-0.378766	0.701244
LOC729200	-0.378565	0.751629
LOC730534	-0.378261	0.7272
RNMTL1	-0.378148	0.812118
CD96	-0.377863	0.737264
NUDCD2	-0.377772	0.765556
C4orf14	-0.377148	0.808506
TMEM134	-0.377045	0.700876
NDUFB11	-0.376932	0.895067
MRPS6	-0.376239	0.8102
PIN1	-0.376095	0.620231
EEF1G	-0.376057	0.84535
MRPL13	-0.37545	0.722485
TMEM14C	-0.375071	0.661634
BMS1	-0.374794	0.752792
MRPL21	-0.37469	0.697914
FAM96B	-0.374388	0.63218
UPRT	-0.373931	0.813271
EIF3G	-0.373928	0.904342
LOC649821	-0.373797	0.759713
VDAC3	-0.373654	0.76674
RFTN1	-0.373355	0.793274
MRPS17	-0.373143	0.739661
ARL2BP	-0.372572	0.828738
NDUFB10	-0.372569	0.573705
BRIX1	-0.372234	0.922663
RPF2	-0.372168	0.850301
SDHA	-0.372012	0.729231
LOC439953	-0.371495	0.90652
DUT	-0.371494	0.706087
RPS17	-0.371139	0.838462
LOC389435	-0.370707	0.746565
ECHS1	-0.370112	0.768588
ZNF511	-0.370032	0.635324
RPS13	-0.369841	0.852698
LOC440927	-0.369817	0.812626
LOC645688	-0.369629	0.656313
URM1	-0.369134	0.562239
EPRS	-0.368735	0.890902
LAS1L	-0.368418	0.74658
ATP5G1	-0.367598	0.63223
LOC728553	-0.366948	0.797479
NDUFA9	-0.366699	0.785287
NOL11	-0.366462	0.88006
RPL17	-0.365573	0.888794
ZNF816A	-0.365232	0.672162
C20orf30	-0.365226	0.817757
LOC91561	-0.365085	0.828174
LOC392285	-0.364852	0.847079
LOC441743	-0.36437	0.727217
BOLA2	-0.364343	0.621613
LOC646909	-0.363766	0.653008
LOC650518	-0.362964	0.73929
C19orf2	-0.36288	0.919567
LOC134997	-0.362795	0.914504
DPH5	-0.362712	0.717913
PSMG2	-0.362255	0.811367
TRMT5	-0.362053	0.589258
LOC100133390	-0.362048	0.672645
RPL15	-0.361963	0.878187
UQCRH	-0.361822	0.768394
NDUFS7	-0.36144	0.559444
RPL26	-0.361383	0.863833
TAF1B	-0.36128	0.640729
MKI67IP	-0.36123	0.884495
ELP3	-0.361212	0.727489
LRRC47	-0.361066	0.574573
CCDC115	-0.360931	0.643071
HDHD2	-0.360727	0.752555
CRBN	-0.35997	0.788723
NUP37	-0.359388	0.803438
EXT2	-0.359355	0.650478
PSMA4	-0.359338	0.66464
COX7A2L	-0.359203	0.730039
LOC392522	-0.358754	0.591086
LOC100130553	-0.35867	0.588183
LOC727761	-0.358562	0.541897
LOC648249	-0.358241	0.826831
THAP11	-0.358231	0.823721
RPS27	-0.356745	0.922478
NDUFS3	-0.35665	0.835842
RPS29	-0.356316	0.846439
DNMT1	-0.355383	0.805106
SS18L2	-0.355321	0.88029
HSPE1	-0.354996	0.614951
LOC644029	-0.354982	0.906569
SAE1	-0.354727	0.894308
ACAT1	-0.35466	0.79862
LOC729798	-0.353893	0.838271
EBP	-0.353818	0.686728
LOC729903	-0.353585	0.814504
LOC728820	-0.353576	0.894028
COX7C	-0.35324	0.921453
CRYZ	-0.353121	0.680574
HNRPM	-0.353091	0.853006
SUCLG2	-0.353045	0.734673
UQCRQ	-0.352948	0.763482
LOC651202	-0.352651	0.804693
LOC729375	-0.352615	0.689864
EEF1A1	-0.352597	0.864761
SMCR7L	-0.35223	0.703834
MRPS23	-0.352141	0.64497
PDCD2	-0.352136	0.848156
LOC387825	-0.351076	0.742006
POLR3F	-0.350928	0.51826
MDH1	-0.350451	0.880582
LOC441506	-0.350439	0.855478
SUCLG1	-0.350342	0.74482
SKIV2L2	-0.350249	0.751759
LOC390345	-0.350081	0.862767
RPLP2	-0.34984	0.770503
PPIAL4A	-0.349681	0.855973
ICAM2	-0.349655	0.741911
CPSF4	-0.349604	0.702083
COQ5	-0.349598	0.758474
C9orf85	-0.349427	0.564608
PFDN1	-0.349182	0.686936
ATP5A1	-0.348881	0.906495
ZNF35	-0.348539	0.565558
CCDC12	-0.348436	0.739983
LOC440991	-0.348434	0.829898
LOC100127993	-0.347947	0.881417
SNRPD3	-0.347877	0.655175
NDUFS8	-0.347514	0.822789
LOC389342	-0.347376	0.876331
AKAP7	-0.347102	0.82564
CPSF3	-0.346965	0.670075
HINT1	-0.346953	0.943518
EIF3A	-0.346891	0.795176
CCDC127	-0.346438	0.771084
LOC646294	-0.346105	0.904803
NDUFS5	-0.346073	0.790642
DNAJC9	-0.345736	0.787996
PPIH	-0.345407	0.860021
RDH14	-0.34507	0.881636
LOC100128196	-0.345008	0.789028
RPL6	-0.344786	0.865234
LOC391833	-0.344601	0.766947
PDCD5	-0.343747	0.739677
MRPS18A	-0.34247	0.556434
SEC61G	-0.342313	0.848933
RPS15	-0.342299	0.807106
RRAS2	-0.342232	0.691505
DGCR6L	-0.34218	0.678565
PDCL3	-0.341803	0.857617
DERL1	-0.341661	0.681923
LOC729279	-0.341389	0.805309
LOC100132199	-0.341273	0.656201
GTPBP8	-0.341259	0.73377
CKS1B	-0.340981	0.744013
LOC645018	-0.340862	0.675806
C12orf65	-0.340849	0.736344
ANAPC10	-0.340815	0.786061
LOC285053	-0.340718	0.782813
RPA2	-0.340616	0.751996
CHI3L2	-0.340572	0.603061
TXLNA	-0.340536	0.667383
C8orf59	-0.340466	0.834945
LOC100130154	-0.340284	0.652427
LOC346950	-0.33998	0.685441
PHB	-0.339725	0.770787
HARS	-0.339658	0.628958
CYCS	-0.339269	0.631261
LOC646766	-0.339224	0.880084
C12orf57	-0.33891	0.802797
RPS14	-0.338604	0.699927
NDUFB8	-0.338455	0.893788
ZNF615	-0.338385	0.566592
DDOST	-0.338205	0.793835
MRPL23	-0.338068	0.693191
LOC441013	-0.33791	0.793878
PTGES2	-0.337885	0.71531
LOC343184	-0.337045	0.842171
NOP56	-0.336582	0.73132
RPL4	-0.33656	0.903103
IMP3	-0.336519	0.943667
Septin9	-0.336154	0.782113
UTP3	-0.335846	0.767724
ARPC5L	-0.335764	0.656435
CLNS1A	-0.335721	0.919466
HNRNPC	-0.335609	0.493008
PPA2	-0.335477	0.749092
EIF2B2	-0.335237	0.606448
FAM195A	-0.335114	0.637434
MRPL41	-0.33508	0.748083
ACADM	-0.335061	0.827228
SELS	-0.335039	0.672166
ZW10	-0.334344	0.792626
LOC730246	-0.334294	0.936256
NDUFAF2	-0.33426	0.808443
NUCKS1	-0.334151	0.717179
LOC728564	-0.333753	0.724201
ILF2	-0.333547	0.930712
NHP2	-0.333456	0.925521
GLOD4	-0.333019	0.914089
ABHD14A	-0.332786	0.824442
PRKRA	-0.332681	0.780392
RPS6	-0.332657	0.85728
YARS	-0.332516	0.766784
LOC148915	-0.332497	0.601712
XBP1	-0.332188	0.739727
TFB2M	-0.330966	0.781415
LOC651198	-0.330928	0.824578
RPL14	-0.33076	0.734866
NIF3L1	-0.330564	0.875992
SNX5	-0.330457	0.6779
C13orf37	-0.330014	0.706317
RARRES3	-0.329703	0.728047
PNPO	-0.328852	0.711863
LOC728139	-0.328515	0.797022
RPL10A	-0.32843	0.932775
ATP5J2	-0.328202	0.64613
PNPLA4	-0.328185	0.553166
MTX2	-0.327979	0.679183
C3orf75	-0.327785	0.729168
EIF3F	-0.32739	0.902879
RPS6P1	-0.32733	0.859418
SUCLA2	-0.327321	0.720281
NIPSNAP1	-0.327283	0.759618
C14orf142	-0.327103	0.755369
LOC440063	-0.327081	0.857592
MRPL15	-0.32702	0.778336
EIF4A3	-0.326899	0.742063
PLRG1	-0.326429	0.818215
TRAPPC4	-0.326353	0.717146
EIF3M	-0.326163	0.887984
GORASP2	-0.325808	0.842803
LOC401537	-0.325786	0.862458
PDCD2L	-0.325483	0.782276
MRPS35	-0.324886	0.857619
CIRH1A	-0.324849	0.828062
GLTSCR2	-0.324542	0.838097
DARS	-0.324478	0.852978
FN3KRP	-0.324292	0.559579
PNO1	-0.322992	0.665793
PSMC2	-0.32293	0.842878
NME1-NME2	-0.322145	0.639107
LOC100130070	-0.322123	0.823179
LOC647285	-0.322095	0.8057
ITGB1BP1	-0.321903	0.7151
C16orf61	-0.321883	0.600144
HSD17B10	-0.321869	0.676318
C1orf149	-0.321273	0.614822
LOC100130980	-0.321234	0.828812
C6orf130	-0.320967	0.806887
RANBP1	-0.32075	0.809243
TINP1	-0.320638	0.85231
C18orf55	-0.320436	0.876967
LOC648622	-0.320124	0.879308
PPA1	-0.320104	0.774411
PSMB2	-0.31957	0.652912
ZDHHC4	-0.319371	0.582529
LOC100130003	-0.319058	0.840263
C12orf47	-0.319042	0.682612
RPS10	-0.318999	0.808221
WDR18	-0.318935	0.738343
LOC391811	-0.318835	0.85662
LCMT1	-0.318696	0.771291
LOC730187	-0.3183	0.755874
DNAJA3	-0.31794	0.809201
LOC285176	-0.317543	0.835076
SEC61A1	-0.316776	0.68866
PSMG1	-0.315861	0.818876
RPL22	-0.315496	0.885381
LYAR	-0.315223	0.75733
LOC148430	-0.315221	0.758448
SUV39H1	-0.315027	0.727167
TES	-0.314712	0.538691
LOC644214	-0.314431	0.684485
DYRK2	-0.314359	0.813408
TMEM4	-0.314297	0.793079
LOC644937	-0.313916	0.761764
UQCRHL	-0.313885	0.789355
TACO1	-0.313325	0.754437
LOC100132488	-0.312934	0.896752
NUP107	-0.312622	0.579174
C16orf53	-0.312386	0.834417
PHPT1	-0.312248	0.633345
HCST	-0.312091	0.729025
TIMM8A	-0.311975	0.689172
EID2	-0.311715	0.759927
LOC441073	-0.311524	0.829081
CHMP4A	-0.31121	0.738962
ERP29	-0.310831	0.887903
ENO1	-0.309951	0.719687
C11orf46	-0.309899	0.760227
MIR607	-0.30972	0.538217
RPS9	-0.309544	0.768665
HSF2	-0.309198	0.697552
EXOSC9	-0.309141	0.871586
CTNNBL1	-0.309043	0.744303
C2orf28	-0.30875	0.896643
CDK4	-0.308723	0.691739
LOC728128	-0.30851	0.889658
LOC644039	-0.308281	0.893127
OCIAD2	-0.307665	0.895698
C10orf35	-0.307604	0.614985
MRPS30	-0.307513	0.822651
EIF3L	-0.307498	0.872876
RPL39	-0.307447	0.639944
CD3D	-0.306928	0.905506
RPUSD3	-0.306744	0.695658
PABPC4	-0.306628	0.680063
ACBD6	-0.306475	0.626396
PIGY	-0.306147	0.796528
UBQLN4	-0.305833	0.702929
NMT2	-0.305724	0.806939
NDUFA6	-0.305568	0.553304
LOC652595	-0.305094	0.727365
GIMAP7	-0.305079	0.893582
MRPS10	-0.305005	0.669424
MRPL50	-0.304416	0.8502
SLC25A6	-0.304326	0.754832
NCRNA00219	-0.304304	0.776423
FBXO21	-0.304191	0.763454
SNX4	-0.303793	0.761214
GPR18	-0.303755	0.784329
RPS16	-0.3037	0.79131
RASGRP1	-0.303359	0.837345
RPS27A	-0.303033	0.783742
RAD51C	-0.303015	0.698252
ATP5O	-0.302859	0.909047
LOC728791	-0.302659	0.475809
LOC441150	-0.302256	0.655471
EMG1	-0.302193	0.748671
C12orf32	-0.301965	0.595172
LOC127295	-0.301389	0.902287
ABCF1	-0.301056	0.73608
LOC389168	-0.30105	0.89249
STRA13	-0.300949	0.695418
MRPL45	-0.300637	0.911739
RPL18A	-0.300616	0.85565
LOC646819	-0.300487	0.659869
PSMD14	-0.300427	0.745717
UXT	-0.300409	0.799488
UBE3A	-0.300285	0.834688
PAFAH1B3	-0.300018	0.840972
POLR1C	-0.299499	0.821472
RPS5	-0.299336	0.898874
LOC100134273	-0.299003	0.578388
PAK1IP1	-0.298899	0.841549
ACTL6A	-0.298392	0.849155
LOC441246	-0.298179	0.901652
LOC100131387	-0.297885	0.732433
MRPL24	-0.297573	0.840475
NSA2	-0.296883	0.812598
C3orf26	-0.296703	0.639853
KRT10	-0.296677	0.669669
RPL5	-0.296094	0.866736
NAT10	-0.295975	0.761154
C2orf44	-0.295664	0.657968
SNX17	-0.29561	0.651791
LOC645173	-0.295379	0.884537
LOC100128836	-0.295168	0.695657
LOC550643	-0.294962	0.850512
HPRT1	-0.29464	0.831432
TTC27	-0.294634	0.839914
LAGE3	-0.294587	0.856356
LOC729317	-0.294468	0.711851
UBXN1	-0.294441	0.746463
LOC649839	-0.29437	0.598184
CCT3	-0.294046	0.750289
PSMB5	-0.293913	0.597407
SEPHS1	-0.293833	0.875122
TOMM20	-0.29357	0.821571
PARL	-0.293205	0.731829
SLAIN1	-0.292142	0.811873
PDXDC1	-0.292009	0.668278
LOC136143	-0.291532	0.665917
HINT2	-0.291101	0.706601
LOC642892	-0.290877	0.744322
APEX1	-0.290825	0.889924
TOMM7	-0.290789	0.800736
MIS12	-0.290505	0.794591
ZNF593	-0.290318	0.726813
ATPAF1	-0.290256	0.725006
ZNF17	-0.289981	0.776596
LOC100132742	-0.289215	0.914063
ATIC	-0.289144	0.888427
LOC653162	-0.289061	0.756451
LOC100131735	-0.288662	0.753284
ECH1	-0.288432	0.727768
LOC649946	-0.288356	0.793421
KLHDC3	-0.288059	0.730335
MRPL46	-0.287716	0.855159
LOC202227	-0.287364	0.578383
LOC100128410	-0.287332	0.867597
LOC729679	-0.287159	0.773793
SARS2	-0.28702	0.668986
TMSB10	-0.286802	0.642743
PVRIG	-0.286294	0.826687
RPL39L	-0.286239	0.530321
C21orf59	-0.28617	0.647435
FAM3C	-0.2858	0.718852
RPS2	-0.285603	0.813913
CCDC104	-0.285497	0.724922
MTERFD1	-0.285377	0.787806
HNRPA2B1	-0.285348	0.801845
LOC100132658	-0.28479	0.703603
SYNCRIP	-0.284742	0.71794
EEF1B2	-0.28452	0.645949
LOC730004	-0.283661	0.819013
RPL13L	-0.283649	0.771623
UQCRFS1	-0.283456	0.841297
RPL35	-0.283437	0.820696
LOC642357	-0.283197	0.816924
PRKCH	-0.282284	0.784273
TRIAP1	-0.281968	0.789089
AARS	-0.281947	0.769884
DHX15	-0.281498	0.758252
BEX2	-0.281442	0.634102
LTV1	-0.281416	0.737916
LOC143543	-0.280754	0.725211
LOC387841	-0.280691	0.914471
RWDD4A	-0.280541	0.643945
LOC339970	-0.279891	0.550039
RABGGTB	-0.279621	0.67744
LOC730029	-0.279571	0.87132
CLYBL	-0.279083	0.683045
CYB5B	-0.279001	0.814203
COX10	-0.278747	0.824265
B3GNT1	-0.278744	0.556783
RRP15	-0.278613	0.852177
LOC440027	-0.277156	0.807161
EIF2B3	-0.277054	0.578073
C6orf203	-0.276851	0.612584
RPA3	-0.276782	0.675891
CXorf56	-0.276419	0.630791
NSMCE2	-0.276021	0.568118
C1orf203	-0.275988	0.698488
LOC653314	-0.275753	0.788844
STK39	-0.27568	0.803299
EIF3I	-0.275586	0.770681
MRPL54	-0.275441	0.779612
PRMT6	-0.273681	0.805659
NRAS	-0.273608	0.635436
ALG3	-0.273549	0.654036
RSL24D1	-0.273447	0.838361
ENDOG	-0.273315	0.614892
LOC648210	-0.273261	0.870547
LOC653147	-0.27308	0.633419
MRPL19	-0.272705	0.611297
NUP54	-0.27168	0.708098
S100A10	-0.271669	0.6241
EBNA1BP2	-0.27157	0.893479
PAAF1	-0.271132	0.705834
LOC100132992	-0.270983	0.736231
ILVBL	-0.270927	0.837339
LOC728428	-0.270479	0.823143
NICN1	-0.270191	0.6388
CUTA	-0.269534	0.818929
HSZFP36	-0.269141	0.648724
PRDX1	-0.268999	0.826269
GTPBP4	-0.268451	0.861411
GSPT2	-0.268268	0.683652
LOC728453	-0.268203	0.832363
LOC100128936	-0.268177	0.888774
FAM96A	-0.268146	0.494686
LOC645899	-0.268093	0.810154
LOC647099	-0.267342	0.734126
BCCIP	-0.267337	0.709397
CA5B	-0.267216	0.634667
LOC646785	-0.267041	0.774848
RPL19	-0.266978	0.907031
CRY1	-0.266903	0.710423
UTP18	-0.266584	0.676838
SNRPG	-0.266579	0.850012
COPS4	-0.266238	0.843564
C6orf125	-0.266198	0.76451
TRMT112	-0.266133	0.785462
ACTR6	-0.266019	0.751497
LOC100133812	-0.265929	0.848319
C14orf166	-0.26574	0.885311
TIGA1	-0.265457	0.792907
LOC100132673	-0.265018	0.815126
NARS	-0.264771	0.706587
ISOC1	-0.264053	0.66188
DCTD	-0.264018	0.792015
RPL8	-0.263913	0.713929
CBX5	-0.263729	0.63626
LANCL2	-0.263728	0.687247
CDR2	-0.263595	0.730235
HSPA9	-0.263555	0.923383
FAM175B	-0.263261	0.826389
C2orf47	-0.262876	0.697823
EID3	-0.262769	0.685651
MIF	-0.26234	0.864866
C19orf53	-0.262218	0.790435
LOC387703	-0.262061	0.653595
PET112L	-0.262016	0.730984
PRMT3	-0.261628	0.709741
LOC100129237	-0.261028	0.72629
C5orf39	-0.260829	0.811398
COMMD1	-0.260644	0.791779
PRPF4	-0.260458	0.574037
LOC729789	-0.260347	0.864525
LOC643007	-0.260278	0.501197
LOC401019	-0.259966	0.810128
MNAT1	-0.2595	0.730202
AOF2	-0.258957	0.705427
LOC729608	-0.258879	0.809612
LOC728060	-0.258706	0.599305
LOC647340	-0.258443	0.705643
MAD2L2	-0.258376	0.523834
RNASEH1	-0.258333	0.618922
LUZP1	-0.258079	0.69607
LOC646942	-0.257594	0.766429
SLAMF1	-0.257296	0.745046
LOC388720	-0.256716	0.815492
TSEN15	-0.255992	0.746182
PRMT1	-0.255628	0.724862
C17orf68	-0.255326	0.559881
C11orf1	-0.255171	0.799939
MOAP1	-0.255104	0.693336
LOC730754	-0.254763	0.689385
LOC440733	-0.254676	0.744697
ADSL	-0.254564	0.825295
POLR2D	-0.253433	0.6415
FARS2	-0.253015	0.694019
LOC388556	-0.252567	0.650356
LOC284393	-0.252548	0.870297
SNRPD2	-0.252245	0.867642
LOC441154	-0.252233	0.796638
LOC441034	-0.25203	0.782152
SSBP1	-0.251979	0.839081
FAM136A	-0.251881	0.608144
SRPRB	-0.250787	0.824446
BLMH	-0.250763	0.539346
CXorf26	-0.25046	0.828414
LPXN	-0.250208	0.871154
WBSCR22	-0.249426	0.832328
FAM173A	-0.249143	0.604043
LOC90624	-0.249135	0.61376
LOC388707	-0.24855	0.800544
PCCA	-0.248274	0.596793
SUPT3H	-0.2478	0.662633
SSB	-0.247793	0.797468
NMD3	-0.247604	0.742419
LOC100130775	-0.247604	0.745816
CD48	-0.247106	0.893906
HIBADH	-0.246734	0.68785
C1QBP	-0.246658	0.797555
AASDHPPT	-0.246598	0.687944
SIP1	-0.246467	0.806399
YARS2	-0.246169	0.770137
C6orf190	-0.246152	0.74639
MRPS9	-0.245909	0.765041
LRRC40	-0.245805	0.657216
SNRPC	-0.24571	0.654164
MEX3C	-0.245616	0.637452
LOC100129599	-0.24473	0.687915
LOC400963	-0.244695	0.860324
LOC100129158	-0.244602	0.731215
PTBP1	-0.244173	0.843795
GAR1	-0.244075	0.799017
C19orf60	-0.244033	0.642242
RPLP1	-0.24357	0.863203
GNL3	-0.243511	0.769469
LOC728126	-0.243454	0.877677
ZC3H8	-0.242902	0.586755
AARS2	-0.242877	0.617706
IL32	-0.242567	0.782011
MRPS31	-0.242474	0.705308
APOA1BP	-0.242065	0.880537
RPL23	-0.241967	0.851189
ARHGEF3	-0.241701	0.746527
RPUSD4	-0.241491	0.88321
DUSP12	-0.241419	0.740659
MRPL55	-0.241419	0.722534
LOC401640	-0.241001	0.659192
LOC650795	-0.240376	0.633815
NTHL1	-0.240263	0.723982
LOC729236	-0.240248	0.889522
SERGEF	-0.240198	0.749305
RPL36	-0.239735	0.916535
ZNHIT2	-0.239205	0.586611
KHDRBS1	-0.238809	0.844952
RPL18	-0.238422	0.825951
CCDC101	-0.238034	0.65387
LOC641848	-0.237833	0.539408
ZFP82	-0.237687	0.734305
LOC100129673	-0.237499	0.623423
LOC646527	-0.237202	0.532009
WDR92	-0.237178	0.626162
AIP	-0.236501	0.640359
C7orf30	-0.236468	0.711432
KIAA1826	-0.236284	0.834933
MDP1	-0.23611	0.543086
CCDC59	-0.235759	0.69849
USE1	-0.235629	0.697256
DRG1	-0.235565	0.833103
BANF1	-0.235515	0.759682
LOC649447	-0.235111	0.884733
PTPRCAP	-0.23501	0.84874
BAG2	-0.234943	0.63787
LOC728590	-0.234915	0.852339
TAF6L	-0.234688	0.71662
MRPL39	-0.233636	0.67357
MCTS1	-0.233561	0.657915
ARL1	-0.233027	0.758393
PTMA	-0.232805	0.7577
ANKMY2	-0.232723	0.589189
LOC728532	-0.232493	0.643395
SRP72	-0.232106	0.742423
PPHLN1	-0.231313	0.684343
TMEM50B	-0.23118	0.741829
DDX28	-0.230604	0.582364
RAB33A	-0.230552	0.73484
SLC25A26	-0.2305	0.721182
RFX7	-0.229739	0.757378
KLHL9	-0.229561	0.632125
XRCC6	-0.229072	0.745067
EVL	-0.228511	0.704978
ACYP2	-0.228182	0.627155
AKR1A1	-0.22814	0.630275
LOC389141	-0.227698	0.836764
MRPS34	-0.227523	0.568005
SFRS3	-0.227117	0.630764
SAAL1	-0.227038	0.725143
FLJ38482	-0.226996	0.735129
LOC345041	-0.226884	0.751416
UFM1	-0.226826	0.643992
FXYD5	-0.226704	0.708314
PECR	-0.226685	0.586781
SLC25A3	-0.226432	0.698403
MED6	-0.226313	0.73883
LEPROTL1	-0.226198	0.70439
THOC3	-0.226151	0.612044
LOC100132457	-0.225935	0.74563
CRIP1	-0.225769	0.645924
BOLA3	-0.224466	0.785054
CEBPZ	-0.224342	0.742516
LCK	-0.22418	0.836572
EZR	-0.224125	0.766119
QDPR	-0.224043	0.665916
AGK	-0.223894	0.695022
LOC643387	-0.223873	0.625152
SEC31A	-0.223652	0.733776
SFXN4	-0.223487	0.616696
ZNHIT6	-0.223353	0.828803
FRG1	-0.222824	0.712759
LOC653881	-0.222691	0.871626
LOC401847	-0.222105	0.599424
LOC100132547	-0.221961	0.651552
PHF14	-0.221949	0.599167
LOC100134504	-0.220625	0.778339
LOC341315	-0.220481	0.54429
HSPH1	-0.220017	0.688682
PDSS2	-0.219869	0.712859
LOC728517	-0.218796	0.832521
NDUFA4	-0.218662	0.819735
PLEKHA1	-0.218647	0.767002
PSMA3	-0.218556	0.726806
EIF3E	-0.218266	0.834146
HDDC3	-0.21808	0.687243
LEO1	-0.217888	0.671848
LSM3	-0.217378	0.616998
MPP6	-0.216817	0.660918
TWISTNB	-0.216679	0.670151
C6orf129	-0.216451	0.698503
LOC390578	-0.216406	0.665562
RRS1	-0.216364	0.81995
SOD1	-0.216285	0.8667
KIAA1430	-0.216277	0.638226
PUM1	-0.215783	0.760009
FARSA	-0.215661	0.578086
POLE4	-0.215554	0.682078
LOC388474	-0.215388	0.764818
METTL5	-0.215117	0.771732
GLUD1	-0.214592	0.681409
ARV1	-0.214168	0.706081
LOC100131196	-0.213484	0.76494
LSM5	-0.213203	0.895796
ZNF256	-0.213009	0.673819
ZNF828	-0.213003	0.689971
RBBP7	-0.212728	0.821062
RBM34	-0.212564	0.795338
EIF3D	-0.212185	0.800447
RPSA	-0.212074	0.894922
NFX1	-0.211984	0.613465
MRPL16	-0.211198	0.539704
TMEM99	-0.211162	0.687927
CD52	-0.211054	0.82454
IAH1	-0.211027	0.624416
EIF3K	-0.211015	0.819834
COX5A	-0.210863	0.831122
LIME1	-0.210724	0.861393
DDX10	-0.210178	0.79048
RPL7A	-0.209833	0.837279
PCGF6	-0.209624	0.597143
RARS	-0.209297	0.752236
PWP1	-0.209233	0.773502
LOC402057	-0.209204	0.674316
UTP14C	-0.208814	0.615011
LOC728484	-0.208377	0.788607
LOC642741	-0.208133	0.896311
TMEM126A	-0.207973	0.817071
PUS3	-0.207905	0.72629
LOC651453	-0.207393	0.700414
CNDP2	-0.207321	0.648207
CHCHD7	-0.207086	0.67957
CCNG1	-0.206782	0.587133
LOC650369	-0.206481	0.856159
PTPLAD1	-0.206121	0.815251
CD8A	-0.206011	0.639701
PPP2R5E	-0.20572	0.592858
WDR12	-0.205136	0.82594
BRP44L	-0.204989	0.535114
LOC390183	-0.204925	0.564203
HNRNPM	-0.204863	0.887677
SNAP47	-0.204174	0.688955
TMX1	-0.20396	0.639788
CCDC109B	-0.203831	0.921509
ETS1	-0.203759	0.84958
MALT1	-0.203724	0.597158
LOC388524	-0.202602	0.859753
LOC389101	-0.202324	0.786414
LOC203547	-0.201787	0.848657
NOP14	-0.201511	0.649081
TCTEX1D2	-0.201338	0.694258
ALDH18A1	-0.200923	0.786087
ESYT1	-0.200327	0.790405
MRPS28	-0.200215	0.694824
MRPL9	-0.199646	0.806983
UCHL3	-0.199586	0.746798
GIMAP5	-0.199482	0.805716
PSMB4	-0.199386	0.628256
ATP5H	-0.199024	0.853393
CYC1	-0.198721	0.792448
LOC100132901	-0.198665	0.584648
GFM1	-0.198129	0.81074
C4orf27	-0.19809	0.74205
LOC388339	-0.19808	0.792512
SNRNP40	-0.19807	0.710076
LOC643433	-0.197204	0.85414
ZNF443	-0.196536	0.593829
MRPS24	-0.196307	0.81892
UBE2Q2	-0.196277	0.819935
RPS19	-0.196273	0.858538
SEC61B	-0.195765	0.743077
DUS4L	-0.195762	0.538504
SPOCK2	-0.195756	0.749632
MRPL3	-0.195607	0.872727
C16orf91	-0.194552	0.651081
DKC1	-0.194482	0.858767
FAIM3	-0.193995	0.762516
NUP88	-0.193701	0.725076
NONO	-0.193373	0.809463
HADH2	-0.193299	0.637711
UTP14A	-0.193196	0.71159
CLINT1	-0.193178	0.576279
LOC645715	-0.192314	0.771397
HNRNPR	-0.192161	0.7827
FLJ43681	-0.192146	0.858846
GPI	-0.191386	0.64786
PRIM1	-0.190645	0.750996
LOC728672	-0.190414	0.67048
C18orf22	-0.190403	0.645229
TCEAL3	-0.189969	0.637212
BZW2	-0.189583	0.817236
LOC441642	-0.189281	0.568913
RPRD2	-0.189205	0.5973
GTF3C2	-0.189177	0.703184
LOC399988	-0.189108	0.779497
MPHOSPH10	-0.188891	0.755477
LOC653773	-0.188789	0.576638
FH	-0.18861	0.871744
MTA2	-0.188245	0.666598
PPP1R13B	-0.188184	0.646316
RPL7	-0.188158	0.645686
LGTN	-0.187355	0.742292
CCDC107	-0.187192	0.618775
BCL2	-0.18675	0.570094
BCKDHB	-0.185754	0.616752
C14orf169	-0.185634	0.746599
CD6	-0.18539	0.71869
PSMA5	-0.185367	0.842753
ASF1A	-0.18511	0.73222
SSR4	-0.184693	0.774398
LOC400455	-0.184295	0.730029
LOC100131572	-0.184268	0.63966
HSPA8	-0.184056	0.836735
RCAN3	-0.183719	0.593739
RALA	-0.183607	0.800445
BAG3	-0.183371	0.679322
MRPL1	-0.183137	0.79158
CD3G	-0.182928	0.764372
LOC643452	-0.18213	0.600284
USP47	-0.18136	0.664716
POGK	-0.180952	0.681831
FAM84B	-0.180323	0.702751
SCOC	-0.180259	0.680273
DHX37	-0.179683	0.610986
LYRM7	-0.179681	0.732663
PPRC1	-0.179617	0.706003
GGCT	-0.179398	0.607421
POLR1E	-0.179323	0.793633
EXOSC5	-0.179193	0.689774
LOC644464	-0.178797	0.889634
ABHD14B	-0.178171	0.745324
BTG3	-0.178076	0.61744
TEX264	-0.17801	0.58753
MGC87895	-0.177644	0.744595
PPP3CC	-0.177195	0.677836
C11orf17	-0.176386	0.641026
LOC388076	-0.176291	0.740177
MYC	-0.175936	0.682314
CCDC91	-0.17577	0.755753
ZNF181	-0.175605	0.698988
SPCS1	-0.175372	0.768879
BMI1	-0.175051	0.750809
EDF1	-0.174671	0.885722
LOC728026	-0.173482	0.672789
NDUFAB1	-0.173456	0.846021
TRAM1	-0.171961	0.850831
LOC644604	-0.171729	0.814394
CSE1L	-0.171355	0.789762
MDC1	-0.171265	0.683307
LOC391019	-0.171246	0.672107
WWP1	-0.170953	0.767742
LOC440595	-0.170874	0.796675
UBA5	-0.170618	0.660173
TMED9	-0.170366	0.55583
LOC642989	-0.169984	0.814409
MRPS33	-0.169808	0.840757
LOC643949	-0.169637	0.591021
PRPF19	-0.169597	0.801316
NOP58	-0.169353	0.843636
HNRNPD	-0.168973	0.831284
CNPY2	-0.16891	0.75303
ALKBH3	-0.168885	0.77933
SFRS1	-0.168454	0.667414
METAP1	-0.168046	0.661156
PIGF	-0.167348	0.648426
LOC647856	-0.166834	0.809727
SERBP1	-0.16641	0.684246
GINS3	-0.166088	0.611847
LOC729301	-0.16593	0.872149
DCUN1D5	-0.165383	0.679912
DDX18	-0.164941	0.854145
CS	-0.164189	0.66868
PRKRIR	-0.163821	0.783304
ZNF800	-0.163601	0.74438
FBXO4	-0.162998	0.703812
MAK16	-0.162762	0.728566
C10orf104	-0.162145	0.589228
HYLS1	-0.162108	0.70182
XPO5	-0.16181	0.59988
RSL1D1	-0.161504	0.784313
LOC729686	-0.161453	0.585948
TADA1L	-0.160205	0.81118
ABHD10	-0.160071	0.643315
CCR7	-0.159616	0.628364
SEPW1	-0.159284	0.612061
MCM3	-0.158976	0.711403
PEPD	-0.158537	0.722289
BRD7	-0.158436	0.578342
CDK6	-0.158367	0.680316
DLAT	-0.158248	0.554783
PPIL1	-0.15759	0.803671
LOC645231	-0.156936	0.626482
LOC649076	-0.156731	0.795245
PRAGMIN	-0.156623	0.668886
LOC100129028	-0.156033	0.721369
RECK	-0.155431	0.709563
ELK1	-0.155336	0.643742
CCDC25	-0.155257	0.755347
RBM45	-0.15505	0.752499
RPS18	-0.154923	0.711576
LETMD1	-0.154796	0.65152
THNSL1	-0.153959	0.628291
ZBTB9	-0.153454	0.802198
ARMCX2	-0.153382	0.623729
TP53RK	-0.153187	0.658946
LCMT2	-0.153141	0.699658
TECR	-0.152963	0.820068
RING1	-0.152836	0.756101
LOC730288	-0.152561	0.725087
HCFC1	-0.152456	0.699294
KIF20B	-0.152021	0.713703
CD2	-0.151722	0.755414
NME7	-0.151677	0.686736
LOC400061	-0.151374	0.68081
SF3B5	-0.151229	0.668409
SURF6	-0.15117	0.609378
LOC650157	-0.150974	0.730751
LOC647030	-0.15083	0.863716
TMEM147	-0.150641	0.822042
ORC5L	-0.150139	0.689808
RFC4	-0.14985	0.682876
FAM69A	-0.14903	0.746752
GOT1	-0.148989	0.834168
ZNF529	-0.148878	0.639732
MRPS15	-0.148754	0.704881
INTS2	-0.148733	0.704464
C3orf31	-0.148275	0.695363
MBNL2	-0.147759	0.644099
TSGA14	-0.147278	0.573426
SUMF2	-0.146194	0.798719
LOC100131261	-0.145826	0.69174
SLC35F2	-0.14577	0.713134
C10orf6	-0.14519	0.638557
LYRM4	-0.143655	0.627376
CTSO	-0.143219	0.620132
DDX1	-0.142769	0.805288
MAD1L1	-0.142236	0.630407
LDHB	-0.142101	0.868172
PAICS	-0.141954	0.811448
ACY1	-0.141009	0.584081
LOC391825	-0.140911	0.583126
C2orf42	-0.140209	0.653136
LOC728843	-0.139651	0.587717
GPX7	-0.13912	0.755924
LOC727984	-0.138955	0.767931
FBXL10	-0.138451	0.716208
LOC646688	-0.138175	0.864431
MAPK6	-0.138003	0.71006
RNPS1	-0.137977	0.769727
C14orf104	-0.137904	0.684334
VDAC1	-0.137701	0.685586
C20orf4	-0.137651	0.564701
MSH6	-0.137032	0.580496
ZNF146	-0.136862	0.733186
SNRPA	-0.136371	0.724376
SUB1	-0.136074	0.669222
CETN3	-0.135873	0.652939
MAGED1	-0.135427	0.787236
LOC220433	-0.134842	0.633997
KRBA1	-0.134042	0.611898
SDHAF1	-0.133461	0.69841
PARP1	-0.133182	0.841416
LOC646841	-0.133166	0.573188
ZNF101	-0.132985	0.648915
C12orf29	-0.13193	0.688437
ABCF2	-0.131279	0.566499
RPP40	-0.131117	0.685192
FAM171A1	-0.130965	0.749194
CCT7	-0.13095	0.539859
LOC731096	-0.130688	0.797884
LOC652071	-0.130178	0.773838
CCNDBP1	-0.129288	-0.559554
IARS2	-0.129092	0.764593
RCADH5	-0.12904	0.600918
TARBP2	-0.129019	0.626014
C2orf30	-0.128879	0.615539
FAF2	-0.127741	0.70602
LOC646195	-0.12663	0.773789
ATRIP	-0.126553	0.711821
DARS2	-0.126367	0.728136
CD40LG	-0.125952	0.787808
IMPDH2	-0.124667	0.804994
LOC100131526	-0.124178	0.540966
ZNF226	-0.123066	0.527306
LOC100129742	-0.122989	0.561396
LOC552889	-0.122983	0.622009
HMGCL	-0.122479	0.600254
ICT1	-0.12231	0.78031
TUT1	-0.122088	0.631205
EEF1AL7	-0.121916	0.698701
MCCC1	-0.121836	0.634055
DENND2D	-0.121127	0.683889
HABP4	-0.12042	0.635775
DHFRL1	-0.119922	0.618546
LOC653702	-0.118082	0.510971
CD28	-0.117941	0.59702
GTF3C3	-0.117644	0.645971
AGPAT5	-0.116895	0.689487
C8orf38	-0.116782	0.623631
CPOX	-0.116395	0.584369
CITED2	-0.116077	0.585828
EIF2B4	-0.115961	0.692372
SLC41A1	-0.11586	0.670054
ADO	-0.115163	0.657741
CBFB	-0.115162	0.591933
RPS6KA1	-0.11508	-0.561932
PIK3IP1	-0.114713	0.552225
C6orf108	-0.114481	0.71789
GADD45A	-0.11443	-0.634978
PTDSS1	-0.114339	0.568543
HSP90AA1	-0.113099	0.77843
GRSF1	-0.112905	0.586251
CCDC6	-0.112869	0.641095
LOC728031	-0.112176	0.825655
SET	-0.111961	0.856749
ICOS	-0.110683	0.702603
KIAA0114	-0.110456	0.631769
ZBTB33	-0.110262	0.666078
FAM98A	-0.110142	0.772077
C12orf23	-0.110109	0.685458
ATM	-0.109999	0.661186
UBE1DC1	-0.108879	0.633774
C10orf61	-0.108156	0.653729
PRKCQ	-0.107921	0.649386
SHMT2	-0.106699	0.80289
PTGES3	-0.10616	0.639151
LOC647276	-0.105244	0.823018
KTELC1	-0.104994	0.644685
ZNF792	-0.10451	0.65424
DYRK4	-0.104043	0.548625
C1orf156	-0.103765	0.635548
UQCRC2	-0.103623	0.551172
SELM	-0.103354	0.638231
LOC100131787	-0.103306	0.7902
LOC402342	-0.10294	0.655665
LOC100131713	-0.102734	0.795122
TRAF3IP3	-0.10119	0.760383
TYW3	-0.100943	0.700539
EIF4A2	-0.100817	0.744793
ZZZ3	-0.0999974	0.816906
LOC729342	-0.0998968	0.599193
CD27	-0.0988962	0.812794
LOC100130446	-0.0985008	0.745303
CDC23	-0.097012	0.735238
ALKBH8	-0.0963966	0.657883
MCM6	-0.0953793	0.690624
CD47	-0.0953678	0.637433
MAL	-0.0953488	0.622976
COIL	-0.0952786	0.690319
ELF4	-0.0951893	-0.538401
LONP1	-0.0946775	0.663676
MUTED	-0.0944692	0.602041
POT1	-0.0938511	0.684701
GPR172A	-0.0933509	0.489289
LOC347292	-0.090326	0.807548
LOC100130892	-0.0902311	0.729469
NARS2	-0.089748	0.601918
LOC441550	-0.0890493	0.528554
RNMT	-0.0882603	0.599532
CYP51A1	-0.088193	0.564664
CSTF2	-0.08811	0.712705
DNAJC10	-0.0881056	0.576589
LOC642828	-0.0875969	0.744585
SIGMAR1	-0.0875825	0.642081
NAE1	-0.0874173	0.754616
INTS10	-0.087415	0.675754
TTC39C	-0.0865955	0.788558
LOC730255	-0.0863517	0.868751
SMARCE1	-0.0857276	0.609572
LOC100131967	-0.0856323	-0.551238
DHX36	-0.0855291	0.631246
DDX39	-0.08544	0.6824
NCL	-0.0852289	0.809986
LOC440957	-0.0851893	0.584874
NAGPA	-0.0849456	0.668923
KIAA0090	-0.0847327	0.731905
TMEM106B	-0.084284	0.562194
CDC42EP4	-0.0835935	-0.552654
C14orf167	-0.0828977	0.571935
LOC137107	-0.0826303	0.603241
RTN4IP1	-0.0825143	0.564726
LOC729535	-0.0820002	0.566143
CRTC3	-0.0817888	0.751146
LOC729340	-0.0814768	0.780948
SP4	-0.0808916	0.58242
RCL1	-0.0798328	0.679961
P4HB	-0.0795398	0.513253
PRRC1	-0.0792028	0.676668
PSMD7	-0.07814	0.615521
NSUN2	-0.0777183	0.661506
MRS2	-0.0775786	0.6307
LOC643358	-0.0772073	0.716269
RANGRF	-0.0768439	0.583339
MED24	-0.0768343	0.669112
LOC647150	-0.076804	0.776868
NOC3L	-0.0760501	0.794365
MAGEE1	-0.075696	0.622448
LOC100130308	-0.0756166	0.443067
NOSIP	-0.07512	0.754248
PEBP1	-0.0749655	0.798454
PHB2	-0.0749564	0.706628
MRPL12	-0.0747806	0.685615
C6orf115	-0.0744644	0.622445
CCDC58	-0.0741264	0.725149
LOC388564	-0.0740731	0.738929
MRPS18B	-0.0737516	0.608928
LARS	-0.0737023	0.687642
ZNF175	-0.0734884	0.630035
GRWD1	-0.0734494	0.630819
EDG1	-0.0731647	0.619161
B3GALTL	-0.0727529	0.598112
SIRPG	-0.0723537	0.698981
GFPT1	-0.0717853	0.610699
TMPO	-0.0715067	0.636845
LOC646966	-0.0711463	0.503237
C16orf30	-0.0706881	0.670194
RPS28	-0.0704258	0.792639
TTF2	-0.0697373	0.590887
LOC100133329	-0.0692994	0.504368
DNAJC19	-0.069125	0.694811
BCAT2	-0.0670531	0.570616
C12orf43	-0.0665249	0.644228
RPL9	-0.0659179	0.680281
LOC392437	-0.0648522	-0.620033
RBBP9	-0.0647687	0.654265
YEATS4	-0.0646746	0.547094
PPM1F	-0.0646372	-0.489682
TXNDC14	-0.0634859	0.713378
ORC3L	-0.0627635	0.557163
S1PR1	-0.06271	0.74494
LOC653658	-0.0615691	0.783158
SLC39A8	-0.0606747	0.590539
FAM62B	-0.0596322	0.597699
RNASEH2B	-0.0594028	0.651702
TST	-0.0589304	-0.542995
SLC9A1	-0.0588629	-0.491868
LMNB2	-0.0586394	0.60267
CYFIP2	-0.0580375	0.686062
THUMPD1	-0.057899	0.739231
LOC644131	-0.0575384	0.536033
GCN1L1	-0.0574706	0.628885
TMEM109	-0.0572573	0.57432
URB2	-0.057212	0.569276
SETDB2	-0.0555977	0.702439
ALS2CR4	-0.055475	0.596542
FTO	-0.0545136	0.654401
BIN1	-0.0540955	0.712135
LOC388344	-0.0527183	0.59444
CCT8	-0.0525623	0.762326
ITFG2	-0.052051	0.59951
H2AFY2	-0.0513387	0.648807
APEX2	-0.0510647	0.588318
SH3PXD2A	-0.0509757	0.549847
LOC284230	-0.0509237	0.784031
NPM3	-0.0505268	0.636868
DDX21	-0.0504008	0.654213
LOC649548	-0.0503629	0.693088
DAP3	-0.050085	0.666746
PARP2	-0.0500223	0.584535
ZNF259	-0.0499778	0.599622
MRPL48	-0.0495309	0.730389
GARS	-0.0487384	0.72792
FNBP1	-0.0483092	0.601568
SRP68	-0.0474884	0.662215
BCL11B	-0.0462131	0.751271
ZNF813	-0.0439164	0.601146
TLE2	-0.0435575	0.550062
RSBN1	-0.0425659	0.628449
ZNF260	-0.0423516	0.715014
LOC100132291	-0.0411993	0.642918
CCDC99	-0.0408038	0.666912
PLCG1	-0.0402286	0.623127
TMEM70	-0.0393245	0.535574
IDE	-0.0389987	0.660099
DUS3L	-0.0369963	0.579765
NELL2	-0.036515	0.619039
CTPS	-0.0365003	0.712663
POLD2	-0.035449	0.684662
CIAPIN1	-0.0335766	0.55271
UBE2D2	-0.0335175	0.604042
KBTBD8	-0.0332996	0.581796
PRKCSH	-0.0332992	0.505865
DDX24	-0.0329708	0.70527
NOLC1	-0.0324683	0.642071
ACACA	-0.0316633	0.581726
C11orf31	-0.0311544	0.551158
PSAT1	-0.0308933	0.565241
SRP19	-0.0308689	0.634854
HPS5	-0.0307916	0.619159
LOC387791	-0.0304003	0.594434
FLT3LG	-0.0296539	0.716439
TAF1D	-0.0294854	0.57906
TEX10	-0.0280665	0.69892
IFT74	-0.0278417	0.650655
ELP2	-0.0262341	0.58197
MBLAC2	-0.026159	0.66857
TIMM9	-0.0260426	0.749582
MGC3196	-0.0246757	0.581588
LOC389223	-0.0241223	0.706676
FBXO31	-0.0240556	0.717236
ZNF275	-0.0235429	0.573724
LOC391655	-0.0232366	0.577193
POLR2I	-0.0219387	0.706206
SLC31A2	-0.0217875	-0.667165
C16orf63	-0.0201947	0.596034
LOC100128337	-0.0191376	0.690902
NUCB2	-0.0188416	0.618072
LOC643308	-0.0183762	0.507349
WIBG	-0.0179181	0.66017
NDUFC1	-0.0176042	0.538877
CAPS2	-0.0172213	-0.606438
HGS	-0.017155	-0.558887
LOC100131905	-0.0170819	0.699662
TRIM32	-0.0168972	0.692819
C19orf61	-0.0161316	0.631456
ELAC2	-0.014264	0.60605
CLEC4E	-0.0142172	-0.735458
TCEA3	-0.0138045	0.589041
PDHX	-0.0136792	0.616992
RRM1	-0.0126049	0.737149
GOT2	-0.010495	0.791306
BYSL	-0.00828944	0.614006
LOC731779	-0.00672598	0.550969
GTF3A	-0.00551463	0.633817
ZNF480	-0.00427415	0.673342
ZNF581	-0.00402182	0.541273
SPATA2L	-0.00347941	-0.611737
TMEM91	-0.00194661	-0.676241
FTHL7	1.19e-05	-0.682621
GPAM	0.000746467	0.641395
CISD1	0.00149906	0.637935
RBM15	0.0021627	0.575989
CALR	0.00234189	0.570394
LOC390530	0.00241659	-0.689722
CDV3	0.00255804	0.509247
AGMAT	0.00272508	0.621509
IL27RA	0.00342598	0.651794
BNIP3	0.00362477	0.607164
MRPS2	0.00556251	0.535023
LOC286512	0.0065118	0.601183
LOC729148	0.00740112	0.678646
PTPLB	0.00902684	0.710823
C2orf89	0.00973377	0.501723
RBM15B	0.00976886	0.554027
FTHL16	0.0097815	-0.68667
HNRPUL2	0.0101668	0.596766
PPP1R15A	0.0102258	-0.567435
BACH2	0.0102551	0.540513
CDK2AP2	0.0105378	0.612342
PPAT	0.0107442	0.670077
IFP38	0.0114137	0.625123
BTN2A1	0.0116588	-0.522908
LOC654194	0.0119027	0.629196
Septin11	0.0119083	0.526248
LOC646936	0.0124125	-0.586116
RAP1GDS1	0.0126939	0.620654
ATMIN	0.0127652	0.564777
C19orf43	0.0133454	0.602942
SLC16A10	0.0146482	0.610412
PFAS	0.0159768	0.678989
PELP1	0.0160209	0.688807
KIAA0020	0.0181864	0.606204
ZBTB24	0.0183624	0.644604
RPL23A	0.0203562	0.817032
APPBP2	0.0205876	0.536238
CMPK1	0.0206536	0.499828
GABARAPL2	0.0206665	-0.545503
RPF1	0.0221684	0.563557
FAM60A	0.0221872	0.759233
SLC38A1	0.0228686	0.675635
IKBKG	0.022897	-0.560205
NPEPL1	0.0232883	-0.499628
ATP1A1	0.0236095	0.705851
RBM17	0.0238739	0.576581
STAMBPL1	0.0241801	0.588787
PPP1R2	0.0242664	0.587643
FKBP3	0.025343	0.647795
AVEN	0.0253733	0.605469
FASTKD1	0.0273212	0.531398
XPO4	0.0284766	0.686445
HOOK1	0.0293962	0.522677
NUP205	0.0312921	0.744955
CHCHD10	0.0323489	0.566621
ATP5D	0.033145	0.700878
GGA2	0.0353776	0.550711
G3BP1	0.0355786	0.749631
PRPF31	0.0359498	0.615676
TMBIM1	0.0359727	-0.652455
PDIK1L	0.0361871	0.711827
ITK	0.0367929	0.60985
GADD45GIP1	0.0375583	0.656402
LOC730235	0.0378592	-0.617099
LOC729660	0.0382668	-0.755148
FTHL11	0.0391228	-0.716311
GIPC1	0.0399401	0.572914
PPP3CB	0.0403681	0.651763
TMEM209	0.0411241	0.699129
C16orf62	0.0413998	0.527743
KTN1	0.0425142	0.651136
PTPN11	0.0441358	0.61453
FTL	0.0446788	-0.654427
C10orf88	0.0458207	0.652479
METAP2	0.0462064	0.776511
NDE1	0.0475369	-0.560333
TAGAP	0.0475983	-0.533777
TSHZ1	0.0495289	0.615409
LOC731365	0.0503371	0.677678
NFE2	0.0505675	-0.73138
DOCK10	0.0514894	0.755065
HSP90AB1	0.0519117	0.710734
TDRD3	0.0521404	0.587231
KDELC2	0.0524887	0.655984
LOC100129424	0.0543096	0.644815
ABCE1	0.0552642	0.810504
LIN7C	0.0555666	0.574756
TTC37	0.0557017	0.66798
WDR75	0.0559043	0.600655
LOC100127893	0.056327	0.45128
SMARCB1	0.0568669	0.600926
LOC391656	0.0590847	0.480576
LANCL1	0.0620505	0.698871
HDAC2	0.0625028	0.540885
APEH	0.0631175	0.55203
FAM159A	0.0632528	0.650673
RRP1B	0.0645364	0.587337
LOC283953	0.0646609	-0.748668
POLR3B	0.0654731	0.621496
MTCP1	0.0655928	0.59788
SLC16A5	0.0667375	-0.607335
YIPF3	0.0670827	-0.655664
SMARCAD1	0.0682104	0.645313
MCM2	0.0683085	0.553129
YWHAG	0.0687609	0.520167
FTSJD1	0.0697684	0.491164
FOSL2	0.0702991	-0.586287
SDAD1	0.070767	0.743234
ATAD1	0.0720758	0.670924
CAMK2G	0.0728231	-0.595644
INTS5	0.0738582	0.500878
WBP11	0.0749989	0.512075
LEF1	0.075525	0.671417
GRPEL2	0.0763333	0.64377
PPP2R1A	0.0768733	0.541773
LOC644790	0.0783867	0.301732
USP5	0.0785446	0.727481
LOC100128326	0.0788646	-0.708228
PARP11	0.0798816	0.618681
CDC25B	0.0799135	0.612121
LOC731314	0.0811571	0.456071
NKRF	0.0815978	0.60031
ISOC2	0.0826646	0.55746
MLKL	0.082702	-0.541488
FLJ14166	0.0829678	-0.671663
RNASE10	0.0851388	-0.566157
LOC643319	0.0853102	-0.66998
VPS37C	0.0863727	-0.595098
LRRC8C	0.0865422	0.578304
TRRAP	0.0880745	0.587671
MRPL38	0.0882644	0.666606
IMMT	0.0887074	0.629454
WDR36	0.0889951	0.623058
C13orf23	0.0895755	0.625225
ZMYM4	0.0896305	0.558996
BUB3	0.0937483	0.63692
ULK1	0.0938285	-0.753723
MTAP	0.095382	0.543315
CD5	0.0957379	0.698983
MYL6	0.0966394	-0.590347
NUDT21	0.0980724	0.581756
CCND2	0.0985143	0.673497
RAB4B	0.100632	-0.55644
ZBED4	0.102407	0.529137
C9orf5	0.102517	0.578345
WIPI1	0.107452	-0.702998
SHPRH	0.10909	0.589297
EIF4B	0.109354	0.65482
STARD7	0.110351	0.595492
LOC100130828	0.111631	-0.576129
DAPK2	0.111723	-0.676815
LOC401357	0.112759	-0.713978
NEU1	0.112935	-0.631122
ZNF295	0.113147	0.527571
CDIPT	0.113475	-0.643025
PBX2	0.113999	-0.614428
API5	0.115021	0.608784
LOC646034	0.116459	-0.652444
PABPC1	0.116593	0.524663
SPTAN1	0.118475	0.594429
LOC400793	0.120017	-0.592416
CGGBP1	0.120056	-0.68617
MORC2	0.120076	0.581492
LDHA	0.121506	0.481096
IBTK	0.121549	0.685653
ZNF185	0.122994	-0.602707
PEX14	0.124522	0.564675
ZC3H18	0.12497	-0.648333
FTHL3	0.125022	-0.702345
LOC728417	0.125181	-0.593082
LOC391334	0.126408	-0.657026
TCF12	0.127981	0.601477
SMAP2	0.128097	-0.684615
ALDOA	0.12908	-0.678892
MBOAT1	0.130148	-0.665317
SUPT16H	0.131232	0.552832
DUSP18	0.133644	-0.606877
NARF	0.133836	-0.650591
LOC644363	0.140765	0.631227
FTHL8	0.142043	-0.765579
LOC643873	0.143256	0.543189
CD3E	0.143594	0.545013
NDUFV2	0.144751	0.567809
TTC19	0.146402	0.620155
LOC196752	0.146673	-0.627213
LOC100131850	0.147455	-0.596989
DHX34	0.148419	-0.691035
RCN3	0.149226	-0.622562
FAM102A	0.15036	0.571159
ZBTB4	0.151238	0.436649
CKAP5	0.152024	0.530977
LOC642567	0.152705	-0.641553
USP14	0.154096	0.613695
IDS	0.154115	-0.681391
SLC12A9	0.157692	-0.64614
NCOA4	0.158403	-0.746333
MTDH	0.158962	0.584204
PCTP	0.159871	-0.73452
DMXL2	0.160069	-0.615164
TFE3	0.160277	-0.750409
SAT1	0.162381	-0.736577
TMEM71	0.162652	-0.662735
GATS	0.163234	-0.611105
PSIP1	0.167396	0.535064
DPEP3	0.168591	-0.666701
LOC100130914	0.170102	-0.757629
TOP2B	0.171753	0.5881
CRK	0.172651	-0.642628
OBFC2A	0.17299	-0.705177
BFAR	0.174692	0.508935
SP100	0.179927	-0.612164
FAM193B	0.181807	-0.704947
LILRB3	0.18333	-0.770391
RBM33	0.183373	-0.519332
TMEM140	0.184669	-0.727515
C17orf56	0.184893	-0.584215
LOC650919	0.185208	-0.634898
LOC641996	0.186609	-0.731191
FTHL12	0.188508	-0.790422
CAND1	0.189214	0.581178
FAM13AOS	0.189986	-0.604827
EPB41L5	0.190364	-0.615408
ANKRD22	0.19079	-0.636427
UBN1	0.191301	-0.693567
HCG27	0.191369	-0.771086
FTHL2	0.192309	-0.73312
C15orf52	0.195207	-0.597397
LOC641825	0.201773	-0.623563
PTPN12	0.205914	-0.680715
CSF2RA	0.209352	-0.685892
SLC22A15	0.209799	-0.677705
LOC100134660	0.210321	-0.67185
DKFZp761P0423	0.210376	0.464542
SLC11A1	0.211561	-0.72093
NPAL3	0.216207	0.605349
GSK3B	0.217626	-0.767317
LOC728440	0.21769	-0.795689
LOC652675	0.220428	-0.632063
NLRP12	0.220893	-0.694997
LOC646064	0.221405	-0.579049
MARK3	0.224133	-0.621605
PHTF1	0.226369	-0.628892
SEC14L1	0.23007	-0.744747
NPL	0.230101	-0.808686
CAMK1D	0.233012	-0.643865
RAB24	0.235147	-0.768247
ZMIZ1	0.23726	-0.68563
MGC16384	0.238585	-0.702113
PDS5A	0.240405	0.546306
TNFRSF10C	0.241884	-0.679703
CDKN2D	0.243822	-0.805375
AOC3	0.24521	-0.613791
C10orf105	0.248544	-0.588324
TREML2	0.248841	-0.764142
SLC39A10	0.253535	0.552943
GDPD3	0.255796	-0.678227
ZNF738	0.258881	-0.706688
RPS6KA5	0.259315	-0.569396
LOC646301	0.259472	-0.714641
IP6K1	0.261775	-0.733877
TTC3	0.264425	0.559336
RALBP1	0.264585	-0.656544
C8orf37	0.266227	-0.570894
SETD1A	0.270588	0.443886
CARD16	0.271049	-0.558677
ACTN1	0.275718	-0.690463
UBE2W	0.277328	-0.611487
LOC651738	0.280605	-0.660053
LOC729009	0.281015	-0.711143
RAXL1	0.281155	-0.625892
TRPC4AP	0.282159	-0.694301
LOC100133591	0.286679	-0.674353
SIGLEC5	0.290606	-0.5935
GABARAPL1	0.291778	-0.796336
LOC730385	0.291858	-0.709012
TMUB2	0.296923	-0.764871
LOC399744	0.297925	-0.724974
SNORA12	0.299347	-0.627232
KIAA1009	0.300391	-0.681436
C16orf7	0.300798	-0.558831
OR2A42	0.301003	-0.625374
LCP2	0.303567	-0.604578
STX10	0.307833	-0.672862
C15orf29	0.307855	-0.675095
KIAA1881	0.309938	-0.681577
REM2	0.311156	-0.684942
P2RX1	0.314216	-0.699136
DDX60L	0.314515	-0.604733
FLOT1	0.315188	-0.72743
NFKBIZ	0.31854	-0.601734
LOC730432	0.320455	0.507437
CASC3	0.322493	-0.679247
ENDOD1	0.324851	-0.512798
KCTD13	0.328106	-0.673372
CSAD	0.331564	-0.734498
LOC728728	0.333056	-0.8117
VCL	0.337372	-0.618791
MKNK1	0.339842	-0.703854
LOC645822	0.340391	-0.563668
DAPP1	0.34314	-0.747454
CCNL1	0.343517	-0.51372
MTMR3	0.343643	-0.727252
KIAA0556	0.344021	-0.621182
LOC100132960	0.344977	-0.665125
C14orf159	0.349293	-0.727225
RHOT1	0.349753	-0.657527
DENND3	0.352268	-0.857229
LOC730286	0.35306	-0.77838
THBS1	0.35401	-0.59974
GDE1	0.358877	-0.613213
FLJ10213	0.363788	-0.649275
SMCHD1	0.36491	-0.719275
LOC100134530	0.364956	-0.825318
EPOR	0.368276	-0.473852
MGC26356	0.370029	-0.704123
CALCOCO1	0.37208	-0.596142
SLC6A6	0.374535	-0.573594
LOC730284	0.378614	-0.810857
LOC100132491	0.383645	-0.743252
EDG4	0.385003	-0.721827
ATG16L2	0.386549	-0.808102
FAM63A	0.393705	-0.823651
PHKA2	0.39421	-0.608847
CEACAM1	0.394302	-0.640148
TRAFD1	0.395231	-0.674104
IVNS1ABP	0.39629	-0.626992
PRRG4	0.399171	-0.742552
WBP2	0.399494	-0.768849
KCNJ2	0.403506	-0.690995
SLC40A1	0.404844	-0.642632
MBD6	0.404987	-0.833181
CD97	0.409244	-0.741156
LOC643313	0.411907	-0.658431
FAM100B	0.412175	-0.725457
LOC100132112	0.413097	-0.795174
C3orf34	0.416174	-0.751087
SLC12A6	0.416206	-0.708079
LOC100134734	0.419413	-0.735224
UBE3B	0.419553	-0.483397
GTF2IP1	0.42339	-0.662082
C15orf28	0.426727	-0.784409
MKNK2	0.4337	-0.710974
LOC730994	0.441231	-0.59477
TAGLN2	0.443081	-0.671599
KIAA1539	0.443163	-0.818469
ALPK1	0.44605	-0.808863
MBOAT2	0.44857	-0.685852
RGL2	0.454296	-0.799605
LOC100134634	0.456448	-0.809433
BIRC2	0.457177	-0.640125
LOC100130835	0.458085	-0.703916
LOC441124	0.459116	-0.659406
SCARNA3	0.459998	-0.657243
C7orf43	0.463638	-0.715901
MAN2A2	0.465366	-0.804602
PRO0628	0.469622	-0.632726
SCYL2	0.476979	-0.557257
PHF20L1	0.477917	-0.605049
LOC729021	0.479315	-0.804651
LOC88523	0.486357	-0.777692
LOC653158	0.48732	-0.561205
LOC651309	0.490813	-0.779327
STAU1	0.495103	-0.574989
KIAA0913	0.495582	-0.747055
TMEM88	0.511213	-0.712072
C17orf62	0.514886	-0.67313
RP5-1022P6.2	0.520553	-0.647311
C7orf53	0.534707	-0.634221
MLL4	0.542047	-0.65347
NRD1	0.599508	-0.673317
STAT5B	0.611711	-0.67009
UPF2	0.616817	-0.693394
