# Supplementary material for: New Insights into the Regulatory Role of Ferroptosis in Ankylosing Spondylitis via Consensus Clustering of Ferroptosis-Related Genes and Weighted Gene Co-Expression Network Analysis
Source: Genes (Basel). 2022 Jul 31;13(8):1373. doi: 10.3390/genes13081373 (PMC9407156; doi:10.3390/genes13081373)
Supplement: Supplementary file 1 [file genes-13-01373-s001.zip › Supplementary Table S5.xlsx]

## Sheet: Network nodes
Nodes	Type	Connectivity
hsa-let-7b-5p	miRNA	5
hsa-let-7e-5p	miRNA	6
hsa-let-7f-5p	miRNA	5
hsa-let-7i-5p	miRNA	6
hsa-miR-106a-5p	miRNA	10
hsa-miR-106b-5p	miRNA	6
hsa-miR-145-5p	miRNA	6
hsa-miR-153-3p	miRNA	6
hsa-miR-17-5p	miRNA	6
hsa-miR-186-5p	miRNA	5
hsa-miR-18a-5p	miRNA	7
hsa-miR-18b-5p	miRNA	5
hsa-miR-196b-5p	miRNA	5
hsa-miR-203a-3p	miRNA	6
hsa-miR-210-3p	miRNA	5
hsa-miR-223-3p	miRNA	5
hsa-miR-26b-5p	miRNA	6
hsa-miR-301a-3p	miRNA	6
hsa-miR-373-3p	miRNA	5
hsa-miR-520b-3p	miRNA	5
hsa-miR-520c-3p	miRNA	5
hsa-miR-520d-3p	miRNA	5
hsa-miR-93-5p	miRNA	5
COMMD7	mRNA	9
EIF4A1	mRNA	9
MRPL17	mRNA	14
MRPL36	mRNA	3
NDUFA12	mRNA	4
NDUFS4	mRNA	6
POLE3	mRNA	16
SNRPB2	mRNA	3
SUMO2	mRNA	14
TMEM126B	mRNA	12
NIP7	mRNA	8
POLR2G	mRNA	1
FENDRR	lncRNA	6
TUG1	lncRNA	13
SNHG16	lncRNA	20
GAS5	lncRNA	8
CRNDE	lncRNA	4
NORAD	lncRNA	3
MIR17HG	lncRNA	9
MIRLET7BHG	lncRNA	5
LINC00958	lncRNA	1
MTA1	TF	1

## Sheet: Network edges
Node1	Node2
EIF4A1	hsa-let-7b-5p
TMEM126B	hsa-let-7b-5p
SUMO2	hsa-let-7b-5p
POLE3	hsa-let-7e-5p
TMEM126B	hsa-let-7e-5p
EIF4A1	hsa-let-7e-5p
EIF4A1	hsa-let-7f-5p
TMEM126B	hsa-let-7f-5p
POLE3	hsa-let-7i-5p
SUMO2	hsa-let-7i-5p
EIF4A1	hsa-let-7i-5p
TMEM126B	hsa-let-7i-5p
COMMD7	hsa-miR-106a-5p
MRPL17	hsa-miR-106a-5p
NIP7	hsa-miR-106a-5p
SUMO2	hsa-miR-106a-5p
EIF4A1	hsa-miR-106a-5p
MRPL17	hsa-miR-106b-5p
SUMO2	hsa-miR-106b-5p
EIF4A1	hsa-miR-106b-5p
MRPL36	hsa-miR-145-5p
NDUFS4	hsa-miR-145-5p
SUMO2	hsa-miR-145-5p
MRPL17	hsa-miR-145-5p
NIP7	hsa-miR-153-3p
TMEM126B	hsa-miR-153-3p
NDUFS4	hsa-miR-153-3p
POLE3	hsa-miR-153-3p
MRPL17	hsa-miR-17-5p
SUMO2	hsa-miR-17-5p
COMMD7	hsa-miR-17-5p
POLE3	hsa-miR-17-5p
NIP7	hsa-miR-186-5p
SUMO2	hsa-miR-186-5p
NDUFA12	hsa-miR-18a-5p
POLE3	hsa-miR-18a-5p
NDUFS4	hsa-miR-18a-5p
SNRPB2	hsa-miR-18a-5p
MRPL17	hsa-miR-18a-5p
NDUFS4	hsa-miR-18b-5p
MRPL17	hsa-miR-18b-5p
POLE3	hsa-miR-18b-5p
NDUFA12	hsa-miR-18b-5p
SUMO2	hsa-miR-196b-5p
MRPL17	hsa-miR-196b-5p
NIP7	hsa-miR-196b-5p
TMEM126B	hsa-miR-203a-3p
SUMO2	hsa-miR-203a-3p
EIF4A1	hsa-miR-203a-3p
NIP7	hsa-miR-210-3p
MRPL36	hsa-miR-210-3p
TMEM126B	hsa-miR-210-3p
POLE3	hsa-miR-210-3p
POLE3	hsa-miR-223-3p
NDUFS4	hsa-miR-223-3p
NIP7	hsa-miR-223-3p
NIP7	hsa-miR-26b-5p
POLE3	hsa-miR-26b-5p
POLR2G	hsa-miR-26b-5p
EIF4A1	hsa-miR-26b-5p
TMEM126B	hsa-miR-26b-5p
NIP7	hsa-miR-301a-3p
SUMO2	hsa-miR-301a-3p
TMEM126B	hsa-miR-301a-3p
POLE3	hsa-miR-301a-3p
POLE3	hsa-miR-373-3p
COMMD7	hsa-miR-373-3p
MRPL17	hsa-miR-373-3p
COMMD7	hsa-miR-520b-3p
MRPL17	hsa-miR-520b-3p
POLE3	hsa-miR-520b-3p
COMMD7	hsa-miR-520c-3p
POLE3	hsa-miR-520c-3p
MRPL17	hsa-miR-520c-3p
COMMD7	hsa-miR-520d-3p
POLE3	hsa-miR-520d-3p
MRPL17	hsa-miR-520d-3p
COMMD7	hsa-miR-93-5p
MRPL17	hsa-miR-93-5p
SUMO2	hsa-miR-93-5p
hsa-let-7b-5p	SNHG16
hsa-let-7b-5p	MIRLET7BHG
hsa-let-7e-5p	GAS5
hsa-let-7e-5p	SNHG16
hsa-let-7e-5p	MIRLET7BHG
hsa-let-7f-5p	TUG1
hsa-let-7f-5p	SNHG16
hsa-let-7f-5p	MIRLET7BHG
hsa-let-7i-5p	SNHG16
hsa-let-7i-5p	MIRLET7BHG
hsa-miR-106a-5p	TUG1
hsa-miR-106a-5p	MIR17HG
hsa-miR-106a-5p	NORAD
hsa-miR-106a-5p	GAS5
hsa-miR-106a-5p	SNHG16
hsa-miR-106b-5p	NORAD
hsa-miR-106b-5p	TUG1
hsa-miR-106b-5p	SNHG16
hsa-miR-145-5p	CRNDE
hsa-miR-145-5p	TUG1
hsa-miR-153-3p	MIR17HG
hsa-miR-153-3p	TUG1
hsa-miR-17-5p	TUG1
hsa-miR-17-5p	SNHG16
hsa-miR-186-5p	TUG1
hsa-miR-186-5p	CRNDE
hsa-miR-186-5p	SNHG16
hsa-miR-18a-5p	FENDRR
hsa-miR-18a-5p	GAS5
hsa-miR-18b-5p	GAS5
hsa-miR-196b-5p	TUG1
hsa-miR-196b-5p	SNHG16
hsa-miR-203a-3p	GAS5
hsa-miR-203a-3p	LINC00958
hsa-miR-203a-3p	SNHG16
hsa-miR-210-3p	GAS5
hsa-miR-223-3p	MIR17HG
hsa-miR-223-3p	TUG1
hsa-miR-26b-5p	TUG1
hsa-miR-301a-3p	GAS5
hsa-miR-301a-3p	MIR17HG
hsa-miR-373-3p	MIR17HG
hsa-miR-373-3p	SNHG16
hsa-miR-520b-3p	MIR17HG
hsa-miR-520b-3p	SNHG16
hsa-miR-520c-3p	MIR17HG
hsa-miR-520c-3p	SNHG16
hsa-miR-520d-3p	MIR17HG
hsa-miR-520d-3p	SNHG16
hsa-miR-93-5p	SNHG16
hsa-miR-93-5p	TUG1
COMMD7	FENDRR
COMMD7	TUG1
EIF4A1	SNHG16
MRPL17	FENDRR
MRPL17	GAS5
MRPL36	FENDRR
NDUFA12	FENDRR
NDUFA12	CRNDE
NDUFS4	NORAD
POLE3	MIR17HG
POLE3	SNHG16
SNRPB2	SNHG16
SNRPB2	TUG1
SUMO2	SNHG16
SUMO2	MIRLET7BHG
TMEM126B	SNHG16
TMEM126B	FENDRR
TMEM126B	CRNDE
MTA1	SUMO2
